1 **A review of the effectiveness of blanket curtailment strategies in reducing bat fatalities at terrestrial**  
2 **wind farms in North America**

3 Evan M. Adams<sup>1\*</sup>, Julia Gulka<sup>1</sup>, and Kathryn A. Williams<sup>1</sup>

4 <sup>1</sup>Biodiversity Research Institute

5 \*Corresponding author

6 E-mail: [evan.adams@briwildlife.org](mailto:evan.adams@briwildlife.org)

7

## 8 **Abstract**

9 Blanket curtailment of turbine operations during low wind conditions has become an accepted  
10 operational minimization tactic to reduce bat mortality at terrestrial wind facilities. Site-specific studies  
11 have demonstrated that operational curtailment effectively reduces impacts, but the exact nature of the  
12 relationship between increased cut-in speed and fatality reduction in bats remains unclear. To evaluate the  
13 efficacy of differing blanket curtailment regimes in reducing bat fatality, we examined data from turbine  
14 curtailment experiments in the United States and Canada in a meta-analysis framework. We tested  
15 multiple statistical models to explore possible linear and non-linear relationships between turbine cut-in  
16 speed and bat fatality reduction while controlling for control cut-in speed. Because the overall sample size  
17 for this meta-analysis was small ( $n = 36$  control-treatment studies from 16 field sites from the American  
18 Wind Wildlife Information Center and a recent review), we conducted a power analysis to assess the  
19 number of control-impact curtailment studies that would be needed to understand the relationship  
20 between fatality rate and change in cut-in speed under different fatality reduction scenarios. We also  
21 identified the characteristics of individual field studies that may influence their power to detect fatality  
22 reduction due to curtailment. Using a response ratio approach, we found any curtailment strategy reduced  
23 fatality rates by 56% for studies included in this analysis ( $p < 0.001$ ). However, we did not find strong  
24 evidence for linear ( $p = 0.07$ ) or non-linear ( $p > 0.11$ ) associations between increasing cut-in speeds and  
25 fatality reduction. The power analyses showed that the power to detect effects in the meta-analysis was  
26 low if fatality reductions were less than 50%. Synthesizing across all analyses, we need more well-  
27 designed curtailment studies to determine the effect of increasing curtailment speed and the effect size is  
28 likely of a magnitude that we had limited power to detect.

29

## 30 **Introduction**

31 Wind energy development is increasing rapidly worldwide and hundreds of thousands of bat  
32 fatalities are estimated to occur per year due to collisions with terrestrial wind energy facilities in North  
33 America [1–3]. Turbine attraction is the leading explanation for high observed fatality rates, particularly  
34 in migratory tree bats [4,5]. Between 70% and 80% of bats killed at wind energy facilities in the U.S. are  
35 migratory tree bats, including hoary bat (*Lasiurus cinereus*), eastern red bat (*L. borealis*), and silver-  
36 haired bat (*Lasionycteris noctivangans*; [3,6–8]. While fatality rates are variable among sites, the  
37 magnitude of mortality for some North American bat species is high enough to be considered a serious  
38 conservation concern [9,10].

39 Curtailment of turbine operations during low wind conditions, particularly in late summer and fall  
40 when fatality rates are highest, has become an accepted operational minimization tactic to reduce bat  
41 fatality at terrestrial wind facilities [11]. By increasing the cut-in speed, or the wind speed at which a  
42 turbine generator begins to produce electricity, curtailment reduces turbine blade spinning rates. Below  
43 the cut-in speed, turbine blades still spin with the wind but do so much more slowly, especially if blades  
44 are “feathered” or pitched to catch as little wind as possible. Because bats tend to be more active at lower  
45 wind speeds, increasing turbine cut-in speed can significantly reduce bat fatality [1,12]. However, a great  
46 deal of variability has been reported in the level of fatality reduction achieved by curtailment, likely due  
47 to the effect of myriad factors (e.g., curtailment regime, time of year, weather, turbine dimensions, and  
48 landscape characteristics; [8]) on fatality risk. While site-specific studies have demonstrated that  
49 operational curtailment is effective at reducing impacts, the exact nature of the relationship between  
50 increases in cut-in speed and fatality reduction in bats remains unclear.

51 For this study, “blanket” curtailment, in which wind speed and time of day/year are used to  
52 determine when to curtail, has both operational and financial implications for wind facility operators [13].  
53 At present, the exact nature of the trade-off between turbine energy production and bat fatality  
54 minimization is poorly understood. Larger increases in cut-in speeds will further reduce power

55 generation. Still, the implications for fatality reduction are less clear, in part because this type of  
56 assessment requires intensive monitoring and is subject to errors introduced by imperfect detection and  
57 small sample sizes. Despite limited evidence that raising blanket cut-in speeds above 4.5 m/s will further  
58 reduce bat fatalities [14], regulators now have required operational minimization for some new wind  
59 projects in the United States and Canada at wind speeds up to 6.9 m/s [15]. A synthesis of the available  
60 data from designed curtailment studies will allow us to quantify better the relative benefits of increasing  
61 turbine cut-in speed for reducing bat collision fatality.

62 A meta-analysis framework is used to synthesize data across studies to determine the effect of  
63 curtailment on bat fatality reduction. Meta-analysis provides a method to account for multiple types of  
64 uncertainty and use predictor variables to explain patterns between studies [16]. Random effects meta-  
65 analyses are needed to account for the uncertainty in effects from each study and the uncertainty in the  
66 true effect size to which all studies contribute. Using such an approach, we aim to evaluate the current  
67 knowledge of the effectiveness of blanket curtailment regimes in reducing bat fatalities at terrestrial wind  
68 projects in North America. We identified three objectives: 1) evaluate existing control-treatment  
69 curtailment study data for bats in a meta-analysis framework to examine the relative benefit of increased  
70 curtailment cut-in speeds and examine the importance of geography and turbine dimensions on fatality  
71 reduction; 2) assess the power of the meta-analysis approach to quantify fatality reduction using a data  
72 simulation approach; and 3) understand how different site or survey characteristics (e.g., fatality rates,  
73 study length, and carcass persistence) influence the power of individual curtailment field studies to detect  
74 a difference in bat fatality rates between control and treatment groups. These analyses are combined to  
75 identify the most likely effect of blanket curtailment on bat fatality reduction, how much additional  
76 information is needed to be certain of these effects, and how to design curtailment experiments to  
77 maximize the value of their results.

## 78 **Methods**

79           The study's overall goal was to understand the relationship between blanket curtailment cut-in  
80 speed and bat fatality reduction at wind facilities in the United States and Canada. To achieve this goal,  
81 we used a response ratio approach that focused on the differences in fatality rates between control and  
82 curtailment treatments in available studies. We used a meta-analysis approach (hereafter referred to as the  
83 “*meta-analysis*”) to control for variability among studies. As we did not have a predetermined assumption  
84 about the nature of the relationship between fatality rate and the change in cut-in speed between control  
85 and treatment, we tested multiple statistical models that allowed for both linear and non-linear  
86 relationships between cut-in speed and the response to determine which best described the observed  
87 pattern. Both the absolute cut-in speed and change in cut-in speed were allowed to influence the predicted  
88 fatality rate. Once the best models were selected, we used them to understand how covariates like study  
89 location and turbine dimensions could influence the relationship between fatality rate and change in cut-in  
90 speed.

91           Because the sample size for this analysis was small (n=36 control-treatment pairs), we also  
92 assessed the likelihood that the above *meta-analysis* would provide statistically significant results and  
93 determined the number of control-treatment pairs needed in this meta-analytical framework to be  
94 confident in our understanding of the relationship between fatality rate and change in cut-in speed. Thus,  
95 we conducted two types of power analyses. The first power analysis (the “*meta-analysis power analysis*”) was  
96 designed to quantify the power of the meta-analysis under different hypothetical scenarios about the  
97 relationship between fatality rate and change in cut-in speed. The first of these scenarios was an *a*  
98 *posteriori* scenario based on the results of the best meta-analysis model using existing data, and four  
99 additional *a priori* scenarios with different relationships between fatality reduction and cut-in speed were  
100 also examined. The second power analysis (the “*fatality estimation power analysis*”) was designed to  
101 inform future curtailment studies and fatality monitoring efforts at operating wind energy facilities. This  
102 analysis assessed the relative quality of different fatality studies at the project scale and identified site and  
103 survey characteristics (e.g., fatality rate, study length, and carcass persistence) that influenced the power

104 of individual curtailment field studies to detect a difference in bat fatality rates between control and  
105 treatment groups. All analyses were conducted in R [17], and all analysis scripts were documented in  
106 *Supplementary Information*.

#### 107 *Data Inclusion*

108 Data for this analysis were collected in part from the American Wind Wildlife Information Center  
109 (AWWIC, Accessed in August 2019), which compiles private and public data from post-construction  
110 fatality monitoring studies at individual wind energy projects in the United States (n=43) [7]. Data from  
111 several additional studies in the U.S. and Canada were harvested from publicly available reports (n =22  
112 with overlap to the AWWIC studies) [14]. Paired control-treatment curtailment studies (hereafter  
113 ‘studies’) with blanket curtailment treatments were of primary interest for this analysis. Studies were  
114 included in the analysis if there was both a treatment and control group of turbines with fatality estimates  
115 at different cut-in speeds at the same project site (Fig. 1). Data were excluded from analysis if there was  
116 no change in cut-in speed between treatments (e.g., testing other fatality reduction methods) or no  
117 measurement of treatment effect (e.g., no control treatment). The remaining studies in the database (n=36;  
118 Table 1) were conducted at 17 wind energy project sites in the U.S. and Canada from 2005-2016. There  
119 were instances where multiple experimental cut-in speeds were tested simultaneously at the same project,  
120 resulting in multiple studies from the same project and year that shared a control. Studies without  
121 precision estimates for their fatality ratios were included in the analysis by applying the global average  
122 standard error.

123 Figure 1. PRISMA meta-analysis data flow diagram for the study. After receiving a list of all projects in AWWIC  
124 and the CanWea syntheses that reported turbine curtailment we removed duplicates between the two sources.  
125 Individual studies within those projects were determined to be suitable for analysis if they used a blanket curtailment  
126 treatment and there were multiple cut-in speeds that could be compared.

127

128 Fatality estimates in the AWWIC database, which were reported from the original studies, had  
129 already been adjusted for detection probability (observer ability to detect carcasses that are present) and  
130 carcass persistence (rate of removal of carcasses by scavengers) using searcher efficiency trials and

131 carcass persistence trials, respectively [18]. There are multiple approaches for correcting fatality estimates  
 132 that differ in their assumptions regarding how to account for detection error resulting from carcass  
 133 removal and searcher efficiency [18,19].

134 **Table 1.** Bat fatality curtailment study data from the AWWIC and CanWEA databases, including project name,  
 135 year, geographic region, and rotor diameter in meters (RD); control cut-in speed (Cont.), experimental cut-in speed  
 136 (Exp.), and change in cut-in speed ( $\Delta$ ), all in m/s; and treatment effect information, including the mean fatality ratio  
 137  $\pm$  SE (Fatal. Ratio) and percent decrease in fatality between treatments (%). Studies from the same project and year  
 138 were tested simultaneously and share a control. Some studies lacked information on fatality uncertainty; for these,  
 139 the global average standard error was applied to the fatality ratio.

| Project Name             | Year    | Region       | RD  | Cut-in Speed |      |          | Effect          |    | Source              |
|--------------------------|---------|--------------|-----|--------------|------|----------|-----------------|----|---------------------|
|                          |         |              |     | Cont.        | Exp. | $\Delta$ | Fatal. Ratio    | %  |                     |
| Anonymous East           | 2014    | East         | 77  | 3.5          | 4.5  | 1.0      | 0.50 $\pm$ 0.16 | 50 | AWWIC <sup>2</sup>  |
| Anonymous East           | 2015    | East         | 77  | 3.5          | 5.5  | 2.0      | 1.00 $\pm$ 0.42 | 0  | AWWIC               |
| Anonymous East           | 2015    | East         | 77  | 3.0          | 4.0  | 1.0      | 0.91 $\pm$ 0.36 | 9  | AWWIC               |
| Anonymous East           | 2016    | East         | 77  | 3.0          | 5.0  | 2.0      | 0.69 $\pm$ 0.33 | 31 | AWWIC               |
| Anonymous East           | 2016    | East         | 77  | 3.0          | 6.0  | 3.0      | 0.53 $\pm$ 0.34 | 47 | AWWIC               |
| Casselman Wind           | 2008    | East         | 77  | 3.5          | 5.0  | 1.5      | 0.13 $\pm$ 0.14 | 87 | AWWIC               |
| Casselman Wind           | 2008    | East         | 77  | 3.5          | 6.5  | 3.0      | 0.26 $\pm$ 0.18 | 74 | AWWIC               |
| Casselman Wind           | 2009    | East         | 77  | 3.5          | 5.0  | 1.5      | 0.32 $\pm$ 0.17 | 68 | AWWIC               |
| Casselman Wind           | 2009    | East         | 77  | 3.5          | 6.5  | 3.0      | 0.24 $\pm$ 0.15 | 76 | AWWIC               |
| Criterion                | 2012    | East         | 93  | 4.0          | 5.0  | 1.0      | 0.38 $\pm$ 0.14 | 62 | AWWIC               |
| Laurel Mountain          | 2011    | East         | 82  | 3.5          | 4.5  | 1.0      | 0.42 $\pm$ 0.15 | 58 | AWWIC               |
| Pinnacle Wind Force      | 2012    | East         | 95  | 3.0          | 5.0  | 2.0      | 0.53 $\pm$ 0.15 | 47 | AWWIC               |
| Pinnacle Wind Force      | 2013    | East         | 95  | 3.0          | 5.0  | 2.0      | 0.42 $\pm$ 0.21 | 58 | AWWIC               |
| Pinnacle Wind Force      | 2013    | East         | 95  | 3.0          | 6.5  | 3.5      | 0.25 $\pm$ 0.14 | 75 | AWWIC               |
| Anonymous Midwest        | 2010    | Midwest/West | 82  | 3.5          | 4.8  | 1.3      | 0.53 $\pm$ 0.25 | 47 | CanWEA <sup>3</sup> |
| Anonymous Midwest        | 2010    | Midwest/West | 82  | 3.5          | 4.0  | 0.5      | 0.28 $\pm$ 0.13 | 72 | CanWEA              |
| Anonymous Pac. SW        | 2012    | Midwest/West | 101 | 3.5          | 4.8  | 1.3      | 0.80 $\pm$ 0.37 | 20 | CanWEA              |
| Anonymous Pac. SW        | 2012    | Midwest/West | 101 | 3.5          | 4.0  | 0.5      | 0.65 $\pm$ 0.30 | 35 | CanWEA              |
| Anonymous Pac. SW        | 2012    | Midwest/West | 101 | 3.5          | 4.8  | 1.3      | 0.62 $\pm$ 0.29 | 38 | CanWEA              |
| Fowler Ridge 1           | 2010    | Midwest/West | 89  | 3.5          | 5.0  | 1.5      | 0.50 $\pm$ 0.11 | 50 | AWWIC               |
| Fowler Ridge 1           | 2010    | Midwest/West | 89  | 3.5          | 6.5  | 3.0      | 0.21 $\pm$ 0.07 | 79 | AWWIC               |
| Fowler Ridge 1           | 2011    | Midwest/West | 89  | 3.5          | 4.5  | 1.0      | 0.64 $\pm$ 0.29 | 36 | AWWIC               |
| Fowler Ridge 1           | 2011    | Midwest/West | 89  | 3.5          | 5.5  | 2.0      | 0.38 $\pm$ 0.18 | 62 | AWWIC               |
| Fowler Ridge 1           | 2012    | Midwest/West | 89  | 3.5          | 5.0  | 1.5      | 0.16 $\pm$ 0.06 | 84 | AWWIC               |
| Lakefield                | 2016    | Midwest/West | 77  | 3.5          | 5.0  | 1.5      | 0.56 $\pm$ 0.34 | 44 | AWWIC               |
| Summerview               | 2005    | Midwest/West | 80  | 4.0          | 7.0  | 3.0      | 0.61 $\pm$ 0.28 | 39 | CanWEA              |
| Summerview               | 2007    | Midwest/West | 80  | 4.0          | 5.5  | 1.5      | 0.94 $\pm$ 0.26 | 6  | CanWEA              |
| Wild Cat 1               | 2013-15 | Midwest/West | 100 | 5.0          | 7.0  | 2.0      | 0.20 $\pm$ 0.07 | 80 | AWWIC               |
| Wild Cat 1               | 2016    | Midwest/West | 100 | 5.0          | 6.9  | 1.9      | 0.41 $\pm$ 0.33 | 59 | AWWIC               |
| Bull Hill                | 2013    | Northeast    | 100 | 3.0          | 5.0  | 2.0      | 0.70 $\pm$ 0.23 | 30 | AWWIC               |
| Enbridge Wind            | 2012    | Northeast    | 82  | 3.5          | 5.5  | 2.0      | 0.38 $\pm$ 0.18 | 62 | CanWEA              |
| Raleigh Wind             | 2014    | Northeast    | 77  | 3.5          | 4.5  | 1.0      | 0.23 $\pm$ 0.05 | 77 | CanWEA              |
| Sheffield                | 2012    | Northeast    | 94  | 4.0          | 6.0  | 2.0      | 0.37 $\pm$ 0.13 | 63 | AWWIC               |
| Talbot Wind <sup>1</sup> | 2013    | Northeast    | 101 | 3.5          | 5.5  | 2.0      | 0.04 $\pm$ 0.18 | 96 | CanWEA <sup>1</sup> |
| Wolfe Island             | 2011    | Northeast    | 93  | 3.2          | 4.5  | 1.3      | 0.52 $\pm$ 0.24 | 48 | CanWEA              |
| Wolfe Island             | 2011    | Northeast    | 93  | 3.2          | 5.5  | 2.3      | 0.40 $\pm$ 0.18 | 60 | CanWEA              |

140 <sup>1</sup> This study was a statistical outlier that did not meet the assumptions of the meta-analysis and thus was excluded

141 <sup>2</sup> Data obtained from the American Wind Wildlife Information Center (AWWIC) database, which includes both public and

142 private data.  
143 3 Data obtained from a review by the Canadian Wind Energy Associate [CanWEA 14] and public reports cited therein.

144

145 Studies in this analysis primarily used the Huso and Shoenfield estimators [20,21]. However, some  
146 studies used the Erickson estimator [22], MNRF estimator [23], or custom calculations to adjust fatality  
147 estimates for carcass persistence and searcher efficiency. Adjusted bat fatality estimates per turbine were  
148 presented in the database with upper and lower 90-95% confidence intervals (CIs). As the experimental  
149 period and hours per night when experiments were implemented varied among studies, fatality estimates  
150 were converted to bat fatality per turbine-hour by dividing fatalities per turbine by the total number of  
151 hours of curtailment (number of nights\*hours per night). Study periods varied somewhat between  
152 individual curtailment studies, with some studies examining specific time periods throughout the night or  
153 focusing on different windows of time during fall migration; our approach controls for study-specific  
154 variability by pairing control-treatment groups for analysis, but does assume that the relationship between  
155 turbine-hours and fatalities is robust to potential variation in the effect of curtailment through time. Few  
156 studies reported species-specific fatality rates, so fatality estimates were for all bat species combined.

### 157 *Meta-analysis*

158 The effect size of each study was calculated as a log-transformed ratio between the estimated  
159 fatality of the treatment and the control, both in the unit of bat fatalities per turbine hour (i.e., the log-  
160 transformed response ratio, hereafter ‘RR’). In instances where only a percent decrease was reported, this  
161 was used to calculate the RR ( $\log(1-(\% \text{ decrease}/100)) = \text{RR}$ ). This effect size approach controls for  
162 differences in study design ranging from site-specific effects to the choice of fatality estimator.

163 Manufacturer cut-in speed can vary among turbine makes and models. In most studies, the control  
164 group’s cut-in speed was 3.5 m/s (a common cut-in speed set by turbine manufacturers), though values  
165 ranged from 3.0 to 5.0 m/s. Experimental cut-in speeds varied from 4.0 to 7.0 m/s. Due to this variation  
166 and the small sample size of available studies, the change in cut-in speed between treatment and control



167 ( $\Delta$  cut-in speed) was used as the estimate of treatment magnitude. Thus, the analysis focused on the effect  
168 of relative rather than absolute change in curtailment cut-in speed.

169 We used a random effects meta-analysis that accounts for heterogeneity in the true effect  
170 (between-study variance) and sampling error (within-study variance; [24]). The inclusion of between-  
171 study variance (i.e., the random effect  $\tau$ ) allows for the incorporation of additional uncertainty in the  
172 analysis by assuming the true effect is a random variable that is realized at different magnitudes in  
173 different studies. Confidence intervals (90% or 95% depending on the estimator used) for control and  
174 treatment fatality estimates were converted into standard error (SE) estimates assuming an approximately  
175 normal distribution. While confidence intervals were slightly asymmetrical, a normal approximation was  
176 the best available strategy for conversion given the variation in fatality estimators used across studies. For  
177 independent studies (i.e., those with no shared control), standard error estimates of the RR were  
178 calculated using the delta method [25,26]. In instances where multiple studies shared a common control  
179 (i.e., were conducted simultaneously at the same project site;  $n=23$ ), the correlation among the studies  
180 was calculated by decoupling the associated dependence into a single estimate of uncertainty for each  
181 study [26,27]. In instances where no estimate of uncertainty was provided in the original study, the mean  
182 SE of all studies after decoupling was applied to the estimate.

183 To conduct the meta-analysis and explore the possible relationships between  $\Delta$  cut-in speed and  
184 bat fatality rates, we ran two types of models with the RR as the dependent variable and  $\Delta$  cut-in as the  
185 primary explanatory variable, with control cut-in speed included as an additional covariate. Using the  
186 ‘metagen’ and ‘metareg’ functions from the *meta* R package [28] we tested: 1) *non-linear categorical*  
187 model specifications where studies were binned into three discrete categories to simplify model fitting  
188 ( $1 = \Delta$  cut-in values  $\geq 0.5$  and  $< 1.4$  m/s,  $2 = \Delta$  values  $\geq 1.4$  and  $< 2.6$  m/s, and  $3 = \Delta$  values  $\geq 2.6$  m/s); and  
189 2) *linear continuous* model specifications that treated  $\Delta$  cut-in as a continuous variable. As the categorical  
190 model ignored the ordinal relationships among treatment groups, the continuous model was implemented  
191 to help determine the degree of bias in this approach. We also explored the influence of bin choice on the

192 fit of the categorical model (Appendix A) and other types of models that test for non-linear relationships  
193 in fatality ratio and  $\Delta$  cut-in (e.g., continuous quadratic relationships) before determining the best  
194 approach for this question.

195 For all model types, variation in individual study precision (within-study variance) was accounted  
196 for using a weighted regression approach, so that studies with higher precision influenced the model  
197 parameter estimates more than studies with lower precision. Study weight was determined as a function of  
198 the inverse square of the study standard error plus the overall between-study variance ( $\tau^2$ ).  $\tau^2$  was  
199 estimated using a restricted maximum likelihood approach [29]. One study (Talbot Wind) was determined  
200 to be an outlier and was removed due to disproportionately high leverage compared other studies.  
201 Additional covariates included rotor diameter (RD) and geographic region. Geographic region (Northeast,  
202 East, Midwest/West) was based upon EPA ecoregions (<https://www.epa.gov/eco-research/ecoregions>) but  
203 consolidated to ensure enough studies per category for inclusion in the model (Table 1). Hub height was  
204 considered for inclusion as a covariate but had little variation across studies (n=30 studies with hub height  
205 of 80 m). There was not enough data to consider interactions among these covariates. We also lacked data  
206 to consider controlling site dependencies among studies using a random effect. We examined between-  
207 study heterogeneity and model goodness of fit using Cochran's Q (QE),  $\tau^2$ , and  $I^2$  model statistics [30].  
208 Model selection was performed based on AIC<sub>c</sub> values and model weights were calculated based on these  
209 values for each model type separately.

#### 210 *Meta-analysis Power Analysis*

211 To determine the number of studies required in a random effects meta-analysis to detect relative  
212 changes in RR with changing cut-in speed reliably, we implemented a power analysis at the meta-analysis  
213 scale using a simulation approach [31]. We conducted meta-analysis power analyses for the *non-linear*  
214 *categorical* and *linear continuous* descriptions of the relationship between  $\Delta$  cut-in speed and RR. For the  
215 categorical relationship power analysis, simulations were designed using the  $\Delta$  cut-in speed categories  
216 defined above to replicate the meta-analysis under multiple scenarios. The number of studies per  $\Delta$  cut-in

217 category, fatality reduction for the first  $\Delta$  cut-in speed category ( $\beta_0$ ), and the subsequent reduction in the  
218 second and third categories ( $\beta_1, \beta_2$ ), were varied across simulations. The following linear regression  
219 equation was used for the categorical model:

$$220 \quad RR = \beta_0 + \beta_1 X_1 + \beta_2 X_2 + \varepsilon + \tau$$

221 where  $X_1$  and  $X_2$  are dummy covariates that represent  $\Delta$  cut-in Categories 2 and 3, respectively. The  
222 uncertainty from the Gaussian error term ( $\varepsilon$ ) and inter-study differences ( $\tau$ ) were added by using a normal  
223 distribution with a mean of 0 and a standard deviation equal to that observed in the fatality ratio of  
224 control-treatment data (Table 1; SD = 0.24). We used a uniform distribution to randomly assign a SE to  
225 each simulated study, which ranged between the minimum and maximum of the observed study standard  
226 errors (Table 1; range: 0.05-0.34). Once the model was simulated, we used the methods described above  
227 to estimate parameters. Each scenario was simulated 10,000 times with 5, 10, 20, and 30 studies per  $\Delta$   
228 cut-in category to achieve precise estimates of power. The statistical power of each parameter ( $\beta_0, \beta_1$ , and  
229  $\beta_2$ ) and sign error (the probability that the estimate was the same sign as the given parameter; [32]) were  
230 calculated to determine the effectiveness of the model in estimating the scenario parameters. Power was  
231 determined by examining whether the results were significantly different from the value of no effect (1  
232 for  $\beta_0$ , and 0 for  $\beta_1$  and  $\beta_2$ ;  $\alpha = 0.05$ ), and the sign error was computed by comparing the signs of the true  
233 parameter value and the estimated value.

234 For the *linear continuous* models,  $\Delta$  cut-in speed was randomly assigned to each study. To do  
235 this, we used the same category framework (where 5, 10, 20, or 30 studies were assigned to each  $\Delta$  cut-in  
236 category), and studies in this category were randomly assigned a  $\Delta$  cut-in speed from that category that  
237 was observed in the studies included in the meta-analysis. These values were then scaled (centered on  
238 zero) and used to build a linear model:

$$239 \quad RR = \beta_0 + \beta_1 X_1 + \varepsilon + \tau$$

240 where  $X_1$  is the scaled continuous  $\Delta$  cut-in speed value for each study.

241 Five scenarios were simulated for the power analysis for the two model types (Table 2). Each  
 242 scenario was replicated at four different sample sizes (5, 10, 20, and 30 studies per  $\Delta$  cut-in category).  
 243 Four of these scenarios were selected *a priori* to explore our power to detect different types of  
 244 relationships between fatality ratio and  $\Delta$  cut-in. We included three scenarios thought to represent  
 245 plausible hypotheses based on observed results to date: 1) a 25% linear decrease in fatality per 1 m/s  
 246 increase in cut-in speed; 2) a 50% initial decrease in fatality with Category 1  $\Delta$  cut-in speed and  
 247 subsequently stable fatality rates; and 3) an initial 50% decrease in fatality with Category 1  $\Delta$  cut-in speed  
 248 and then 10% subsequent declines in fatality for Categories 2-3. The fourth scenario, a more extreme 50%  
 249 exponential decrease per 1 m/s increase in cut-in speed, was intended to provide context for interpreting  
 250 the results of other scenarios. We also included an *a posteriori* ‘current knowledge’ scenario that used  
 251 parameter estimates obtained from the top model in our *meta-analysis* (above).

252  
 253 Table 2. Parameters used in simulation scenarios for the meta-analysis scale power analysis of bat fatality with  
 254 changes in cut-in speed. A total of 20 scenarios for each model type were run with different  $\beta_0$ ,  $\beta_1$ , and  $\beta_2$  values and  
 255 differing numbers of studies per category (*n* Studies). Parameters are log-transformed.

| Model                     | Scenario                      | $\beta_0$ | $\beta_1$ | $\beta_2$ | <i>n</i> Studies |
|---------------------------|-------------------------------|-----------|-----------|-----------|------------------|
| Non-Linear<br>Categorical | Current Knowledge             | -0.67     | -0.19     | -0.46     | 5, 10, 20, 30    |
|                           | 25% Linear Decrease           | -0.29     | -0.41     | -1.1      | 5, 10, 20, 30    |
|                           | 50% Decrease then Stable      | -0.69     | 0.00      | 0.00      | 5, 10, 20, 30    |
|                           | 50% Decrease then 10% Decline | -0.69     | -0.22     | -0.51     | 5, 10, 20, 30    |
|                           | 50% Exponential Decrease      | -0.69     | -0.69     | -0.99     | 5, 10, 20, 30    |
| Linear Continuous         | Current Knowledge             | -0.84     | -0.17     |           | 5, 10, 20, 30    |
|                           | 25% Linear Decrease           | -0.59     | -0.59     |           | 5, 10, 20, 30    |
|                           | 50% Decrease then Stable      | -0.52     | -0.27     |           | 5, 10, 20, 30    |
|                           | 50% Decrease then 10% Decline | -0.70     | -0.5      |           | 5, 10, 20, 30    |
|                           | 50% Exponential Decrease      | -1.04     | -0.89     |           | 5, 10, 20, 30    |

256  
 257 Thus, this power analysis represented a combination of *a priori* and *a posteriori* approaches designed to  
 258 understand the efficacy of the current study, estimate the number of studies needed to reduce uncertainty  
 259 in the meta-analysis, and inform the likelihood that the observed data could be generated by the *a priori*  
 260 scenarios.

261 *Fatality Estimation Power Analysis*

262           To understand the traits of effective curtailment experiments and provide guidelines for future  
263 studies, we used a data simulation approach to determine the effectiveness of project-scale curtailment  
264 studies at detecting differences in bat fatality rates using a hierarchical simulation approach [33]. Three  
265 different data sets were simulated to replicate the process by which true fatalities rates are estimated in  
266 curtailment field studies. First, the true number of bat mortalities was simulated using a Poisson process.  
267 New fatalities were generated each night for each turbine using a fatality rate per turbine-night as a  
268 Poisson mean. Second, carcass persistence rate was estimated using a carcass persistence trial format.  
269 Here, we used the exponential distribution to simulate the survival rates of 50 carcasses at the site based  
270 on the predefined median number of days of carcass persistence. Carcass searches were assumed to occur  
271 every three days for the duration of the study, and the survival probability of the carcasses was used to  
272 estimate daily carcass persistence probabilities for the survey. Third, searcher efficiency data were  
273 simulated based on 100 detection trials using a binomial distribution. These data sets were combined to  
274 determine the number of carcasses detected by the surveyors at each survey interval. Detection  
275 probability for each carcass was a function of carcass persistence, which changed in a time-dependent  
276 manner following the fatality event, and searcher efficiency, which was constant across time. The number  
277 of observed mortalities was determined using a binomial draw from the combined probability of  
278 persistence and detection for each fatality.

279           Forty-eight scenarios were used in this power analysis to explore the effects of effect size, study  
280 period, and carcass persistence on study design, and were based upon information from an early version  
281 of the subset AWWIC database with curtailment studies (June 2019). Simulation parameters were  
282 selected based on averages and ranges from the interim database, and are useful approximations of values  
283 in typical curtailment studies. The curtailment treatment effect was defined as either a 25% or 50%  
284 reduction in fatality rates (n=24 scenarios for each effect). These values were selected based on the 50%  
285 reduction approximated the average fatality reduction. The number of turbines (10 or 15), number of

286 experiment nights (45 or 90), fatality rate (0.1 or 0.3 mortalities/turbine-night), and carcass persistence  
287 rate (3, 6, or 9 mean days of persistence) were varied to determine the effect of these variables on  
288 statistical power. The number of turbines and experiment nights are combined as turbine-nights to  
289 describe study effort. Chosen carcass persistence values tended to be on the lower end of the range of  
290 observed values to test the power of these studies in more challenging environmental conditions.  
291 Detection probability was fixed at 50% for all studies, the approximate median of the described studies.

292 Data were simulated for each scenario using base functions in R v. 3.6 [17] and package *simsurv*  
293 [34]. Package *GenEst* [35] was then used to estimate the true number of fatalities for each treatment group  
294 with the simulated data sets. This process was repeated 50,000 times to obtain consistent estimates of  
295 statistical power. This generalized fatality estimator ('GenEst') differs from those used by studies in the  
296 AWWIC database but is considered the current best practice for estimating fatality from wind turbines  
297 when the sample size is sufficiently large to estimate known biases [35]. The Bayesian posterior  
298 distribution of the number of fatalities for each treatment group was estimated using the function 'estM'  
299 in package *GenEst*. Simulated carcass observations, carcass persistence trial data, and searcher efficiency  
300 data were used as inputs along with assumed static values for the proportion of area searched (50% for all  
301 turbines) and the search schedule (once every three days for all turbines). The mean number of mortalities  
302 in the 25% and 50% reduction treatment groups (along with 95% credible intervals) were estimated using  
303 a parametric bootstrapping approach ( $n = 1000$ ). The 95% credible interval of the difference of the  
304 *GenEst*-derived fatality estimates between these two groups was calculated to determine overlap with  
305 zero and used to estimate statistical power for each scenario, and was determined by subtracting the  
306 bootstrapped simulations for each treatment group. If a simulation study group did not detect any  
307 carcasses, we did not include it in the power analysis calculation.

308

## 309 **Results**

310 Fatality ratios in the database representing fatality reduction due to curtailment ranged from 0.13  
311 (87% decrease in fatalities) to 1.00 (0% decrease in fatalities) with an arithmetic mean of 0.46 (53%  
312 decrease; n=35 studies). Lower fatality ratio values represented a greater reduction in bat fatality per  
313 turbine-hour, while a value of one indicates no difference between curtailment treatment and control (0%  
314 decrease). When examining fatality ratios by  $\Delta$  cut-in category, the mean fatality ratio for Category 1 was  
315 0.60 (n = 12), Category 2 was 0.41 (n = 18), and Category 3 was 0.37 (n = 6), suggesting a possible non-  
316 linear relationship with  $\Delta$  cut-in speed (Fig. 1).

317 Figure 2. The relationship between bat fatality and curtailment difference ( $\Delta$  cut-in; calculated as a change in m/s  
318 between the treatment and control groups) for 16 wind farms in North America. Some wind farms have multiple  
319 data points as there were multiple years of experiments or multiple treatments tested within a year (n=36 studies).  
320 Error bars represent the standard error of the fatality ratio. Talbot Wind was excluded from the meta-analysis as an  
321 outlier.

322

### 323 *Meta-analysis*

324 Thirty-five individual studies (from 16 projects) were included in the meta-analysis modeling.  
325 The estimated fatality ratio across all studies (i.e., the estimate before controlling for  $\Delta$  cut-in speed) was  
326 0.44 (95% CI: 0.36-0.49,  $z = -9.18$ ,  $p < 0.001$ ; Fig. 2). For both categorical and continuous model types,  
327 the models with  $\Delta$  cut-in and control cut-in as covariates represented the best model fit, as indicated by  
328  $AIC_c$  (Appendix A). Comparing across model types, the linear model represented the best fit ( $AIC_c =$   
329 55.67), likely due to model simplicity; the categorical model showed slightly worse fit ( $AIC_c=58.48$ ). A  
330 forest plot was used to show that there was not evidence of publication bias.

331 The best fit linear model had a large and significant amount of residual heterogeneity between  
332 studies ( $QE_{32} = 50.50$ ,  $p = 0.02$ ), with an among-study variance estimate ( $\tau^2$ ) of 0.10 (CI: 0.00, 0.19), while  
333 the percentage of overall variation across studies due to heterogeneity ( $I^2$ ) was 39.2% (CI: 1.1-53.9%).  
334 Based on the linear model, the RR tended to decrease with increasing  $\Delta$  cut-in (slope parameter  $\beta = -0.17$ ,  
335 CI: -0.36-0.02; Fig 3); this relationship nearly met the requirement for statistical significance ( $z = -1.78$ ,  $p$   
336 = 0.07). Control cut-in speed was not a significant covariate ( $\beta = -0.14$ , CI: -0.32-0.05,  $z = -1.47$ ,  $p =$



337 0.14). There was no significant effect of rotor diameter (95% CI: -0.16- 0.24,  $z = 0.35$ ,  $p = 0.72$ ) or  
338 geographic region (Midwest vs. East, CI: -0.35- 0.49,  $z = 0.32$ ,  $p = 0.75$ ; Northeast vs. East, CI: -0.65,  
339 0.33,  $z = -0.63$ ,  $p = 0.53$ ) on bat fatality ratios. The addition of these covariates did result in a slight  
340 decrease in model heterogeneity, however (rotor diameter:  $QE_{31} = 50.0$ ,  $p = 0.02$ ,  $\tau^2 = 0.11$ ,  $\tau^2$  CI = 0.00-  
341 0.20,  $I^2 = 40.1\%$ ,  $I^2$  CI=1.9-55.2%; geographic region:  $QE_{30} = 46.3$ ,  $p = 0.03$ ,  $\tau^2 = 0.11$ ,  $\tau^2$  CI = 0.00-0.21,  
342  $I^2 = 38.7\%$ ,  $I^2$  CI=0.0-55.3%).

343 Figure 3. The effect of curtailment regime on bat fatalities at terrestrial wind farms in North America from a meta-  
344 analysis incorporating within- and among-study variance. The plot shows the fatality ratio (black square) and 95%  
345 CI (error bars) of individual studies along with the mean effect size for each  $\Delta$  cut-in category (grey diamonds). The  
346 95% confidence interval of the overall effect is shown at the bottom (black diamond). Individual studies were  
347 weighted (out of 100%) based on study uncertainty (CI, in brackets) and distance from category mean effect, with  
348 square size indicating relative weighting. A fatality ratio of 1 indicates no difference in fatality rate between the  
349 control and experimental curtailment treatments.

350

351 The best fit model with a categorical response to  $\Delta$  cut-in speed also had a large and significant  
352 amount of residual heterogeneity between studies ( $QE_{31} = 50.76$ ,  $p = 0.01$ ), with an among-study variance  
353 estimate ( $\tau^2$ ) of 0.11 (CI: 0.01-0.21), while the percentage of overall variation across studies due to  
354 heterogeneity ( $I^2$ ) was 41.2% (CI: 2.9-56.0%). When examining fatality reduction by  $\Delta$  cut-in speed, the  
355 model predicted a fatality ratio estimate for Category 1 of 0.52 and represented a significant reduction in  
356 fatality rates ( $\beta = -0.67$ , CI: -0.97 to -0.37,  $z = -4.38$ ,  $p < 0.0001$ ).

357 Figure 4. Meta-analysis estimated linear (black line) and categorical (pink) effect of  $\Delta$  cut-in speed on bat fatality  
358 ratio at North American wind energy projects. Black dots represent fatality ratios for individual studies; note that  
359 uncertainty in individual study estimates, which influenced the meta-analysis parameter estimates, are not shown  
360 here (see Table 2 for these values). Categorical model points are based on mean  $\Delta$  cut-in speed for the category.  
361 Error bars are 95% confidence intervals of estimates.

362

363 The model estimates for fatality ratios for Categories 2 and 3 were 0.42 and 0.34 respectively, but the  
364 marginal change of increasing  $\Delta$  cut-in from Category 1 to Category 2 ( $\beta_1 = -0.19$ , CI: -0.59-0.20,  $z = -$   
365 0.96,  $p = 0.33$ ) and from Category 1 to Category 3 ( $\beta_2 = -0.46$ , CI: -1.02-0.11,  $z = -1.58$ ,  $p = 0.11$ ) were  
366 small, with high amounts of uncertainty in the estimates (Fig. 3). Control cut-in speed was not a  
367 significant covariate ( $\beta = -0.13$ , CI: -0.32-0.06,  $z = -1.31$ ,  $p = 0.19$ ). Analysis of study-scale covariates



368 revealed no significant effect of rotor diameter (95% CI: -0.19- 0.23,  $z = 0.16$ ,  $p = 0.87$ ) or geographic  
369 region (Midwest vs. East, CI: -0.35- 0.55,  $z = 0.45$ ,  $p = 0.65$ ; Northeast vs. East, CI: -0.71, 0.32,  $z = -0.73$ ,  
370  $p = 0.46$ ) on bat fatality ratios. The addition of these covariates did not result in decreases in model  
371 residual heterogeneity.

372

### 373 *Meta-analysis Power Analysis*

374 Power analysis of the categorical model revealed that for most scenarios, five studies were  
375 required to have adequate statistical power ( $>0.8$ ) to determine an effect of curtailment on the fatality  
376 ratios for Category 1 ( $\beta_0$ ; 0.5-1.3 m/s  $\Delta$  cut-in; Fig. 4). The exception was the 25% linear decrease  
377 scenario, which required over 30 studies to achieve adequate power due to smaller changes at lower  $\Delta$   
378 cut-in speeds. The statistical power of  $\beta_1$  and  $\beta_2$  ( $\Delta$  cut-in Categories 2-3) were more variable across  
379 scenarios (Fig. 4). For  $\beta_1$  (1.5-2.3 m/s  $\Delta$  cut-in speed), the 50% exponential decrease scenario had  
380 sufficient power at 20 or more studies, and the 25% linear decrease scenario had sufficient power at 30  
381 studies per group, but no other scenario met the criteria for sufficient power. For  $\beta_2$  (3-3.5 m/s  $\Delta$  cut-in  
382 speed), two scenarios achieved sufficient power with less than 10 studies per group (50 % exponential  
383 decrease, 25% linear decrease), while another two achieved sufficient power with 20-30 studies per group  
384 (50% decrease followed by 10% decreases, and current knowledge scenario). Sign error decreased with  
385 increasing sample size for all parameters except those that were set at zero ( $\beta_1$  and  $\beta_2$  in the 50% decrease  
386 then stable scenario) and decreased below 10% at 10 studies per category for most other parameter  
387 estimates.

388 Figure 5. The relationship of statistical power and sign error with sample size in the categorical meta-analysis-scale  
389 power analysis of curtailment studies to reduce bat fatality rates. We examined the relationship between the number  
390 of studies per category of  $\Delta$  cut-in speed (Category 1 =  $\beta_0 = 0.5$ -1.3 m/s  $\Delta$  cut-in speed, Category 2 =  $\beta_1 = 1.5$ -2.3  $\Delta$   
391 cut-in speed, Category 3 =  $\beta_2 = 3$ -3.5 m/s  $\Delta$  cut-in speed) and 1) the statistical power to detect change between  
392 categories (at top), and 2) the rate at which models would be expected to incorrectly predict the sign of parameter  
393 estimates (at bottom). Colors represent different curtailment regime scenarios. The horizontal dashed lines represent  
394 the 0.8 power threshold and 50% sign error threshold, respectively.

395

396 In comparison, the continuous model often had higher power, particularly for constant or  
397 increasing relationships between RR and  $\Delta$  cut-in (Fig. 5). Power to detect linear trends ( $\beta_1$ ), particularly  
398 for the scenarios with decreases at  $\Delta$  cut-in speeds greater than 1.3 m/s, was greater than 0.8 even with  
399 only 5 studies per group. Only the 50% then stable and current knowledge scenarios showed poor power,  
400 likely needing 20-30 studies per group to measure the decrease accurately. The average value (or  
401 intercept,  $\beta_0$ ) was more difficult to precisely estimate, though this parameter is less important to the  
402 present study as it does not estimate the change in effect with  $\Delta$  cut-in. As the current knowledge scenario  
403 had the smallest slope out of all the scenarios, it required the largest sample size to have sufficient  
404 statistical power—around 30 studies per category. Sign error was low across all scenarios; it was lower  
405 than 10% whenever the number of studies per group was greater than 10.

406 Figure 6. The relationship of statistical power and sign error with sample size in the linear continuous meta-analysis-  
407 scale power analysis of curtailment studies to reduce bat fatality rates. We examined the relationship between the  
408 number of studies per  $\Delta$  cut-in speed category (Category 1 =  $\beta_0 = 0.5$ -1.3 m/s  $\Delta$  cut-in speed, Category 2 =  $\beta_1 = 1.5$ -  
409 2.3  $\Delta$  cut-in speed, Category 3 =  $\beta_2 = 3$ -3.5 m/s  $\Delta$  cut-in speed) and 1) the statistical power to detect change in  
410 fatality ratio (at top), and 2) the rate at which models would be expected to incorrectly predict the sign of parameter  
411 estimates (at bottom). Colors represent different curtailment regime scenarios. The horizontal dashed lines represent  
412 the 0.8 power threshold and 50% sign error threshold, respectively.

413

#### 414 *Fatality Estimation Study Power Analysis*

415 At the scale of individual curtailment experiments at wind facilities, many factors influenced  
416 these studies' statistical power and sign error. More turbine-nights increased the power of studies in all  
417 scenarios (Fig. 6). However, the importance of turbine-nights varied with several variables outside of  
418 researcher control, such as effect size and carcass persistence. With a 25% fatality reduction between  
419 experimental and control treatments, no tested scenario achieved statistical power of 0.8 when the control  
420 fatality rate was low (0.1 mortalities/turbine-night). For scenarios with a 25% reduction in fatality,  
421 statistical power was high only when fatality rate, carcass persistence, and turbine-nights were also high  
422 (Fig. 6A). The statistical power of studies in the 50% fatality reduction scenarios was more resilient to  
423 changes in sampling period and carcasses persistence than the lower-reduction scenarios. Statistical  
424 power was above the 0.8 threshold across almost all scenarios with high fatality rates (0.3 fatalities per

425 turbine-night), and a large number of turbine-nights yielded strong statistical power even when the fatality  
426 rate was lower (Fig. 6B). Sign error followed a similar pattern, errors occurred more often when fatality  
427 rates and fatality reduction from curtailment were low (Fig. 6C). When fatality reduction was 50%, sign  
428 error was almost always less than 10% (Fig. 6D). In summary, these simulation results suggest that many  
429 curtailment study designs could be effective at detecting differences between treatments in situations with  
430 high fatality rates and high carcass persistence. None of the tested study designs were effective in  
431 detecting change when fatality reduction and carcass persistence were low. Based on the studies in our  
432 database (which had a median number of 14 turbines and 75 experimental nights, 1050 turbine-nights,  
433 and 16 of 36 studies with percent fatality reductions <50%), many studies could have low power and high  
434 sign error if fatality rate and carcass persistence is low.

435 Figure 7. The relationship of statistical power (A, B) and sign error (C, D) with sample size for curtailment  
436 treatment groups using a simulation approach (n=50,000) using the Generalized Mortality Estimator (*GenEst*).  
437 Variation in power across turbine-nights of study (T-N), fatality rates, and carcass persistence (in mean days of  
438 persistence) is shown when curtailment is simulated to reduce fatality by 25% (A, C) and 50% (B, D). Simulations  
439 assume a three-day search interval for fatality searches and 50% searcher efficiency.

440

## 441 **Discussion**

442 Like past studies, we found evidence that turbine blanket curtailment reduces fatality rates of bats  
443 at wind farms at sites that have implemented the technique (as reviewed by Arnett et al. [36]). However,  
444 the marginal effect of increasing turbine cut-in speed on fatality rates is more difficult to assess. Using a  
445 *meta-analysis* approach, we estimated that the effect of a 0.5-1.3 m/s increase in cut-in speed resulted in a  
446 fatality ratio of 0.52, or a 48% reduction in bat fatalities. Estimated reductions in bat fatalities at higher  $\Delta$   
447 cut-in speeds were not found to be significantly different than this value and had high modeled  
448 uncertainty. The sample size was small, particularly at higher  $\Delta$  cut-in speeds. Within the context of the  
449 *meta-analysis power analysis*, we only had the statistical power to consistently detect reductions of ~50%  
450 per 1 m/s  $\Delta$  cut-in speed. Combined with our meta-analysis results, it appears unlikely that larger  
451 increases in  $\Delta$  cut-in speeds beyond Category 1 result in >50% additional fatality reduction (e.g., the 50%  
452 exponential decrease scenario). Given that we lacked statistical power to detect changes in fatality ratio

453 less than 50%, it is possible the true effect could still be large enough to be ecologically relevant to bat  
454 conservation and management. Other concurrent efforts to address a blanket curtailment found that  
455 increased curtailment speeds did significantly affect bat mortality [37]. While the methods and data set  
456 differ from the present study, Whitby et al. [37] corroborates our estimate of effect size and also show  
457 how volatile these results can be when sample sizes are low.

458           Uncertainty in fatality reduction was variable across studies. While this imprecision was  
459 accounted for in the meta-analysis framework and propagated into parameter estimates, uncertainty  
460 should be minimized through careful study design to maximize the value of each study. Through our  
461 *fatality estimation power analysis*, we found that with high fatality rates ( $\geq 0.3$  fatalities per turbine-night)  
462 and carcass persistence ( $\geq 6$ -9 days), experimental studies were consistently successful in detecting 25-  
463 50% fatality reductions. However, studies with low fatality rates (0.1 fatalities per turbine-night) and  
464 carcass persistence (3 days) were not adequate to detect 25% differences in fatality rates between  
465 treatment and controls groups even with high numbers ( $>2500$ ) of turbine-nights. These results suggest  
466 that effective monitoring studies can be conducted when assumptions are met (e.g., detection probability  
467 is at least 50%), some number of studies could have low statistical power when using the *GenEst*  
468 modeling framework. As the additive effect of further increases in cut-in speed is uncertain, continuing to  
469 conduct high quality curtailment experiments with a high number of experimental turbine-nights,  
470 particularly if fatality rates are expected to be low, would provide data to better estimate the effect of  
471 blanket curtailment and inform conservation and management activities for bats [38].

#### 472 *Assessing the likelihood of curtailment effects on bat fatalities*

473           While the overall effect of blanket curtailment on bat fatality was clear, the relative effect of  
474 incrementally larger increases in curtailment cut-in speed was not. This result was likely due to both small  
475 effect size and sample size. The results of the current knowledge scenario in the *meta-analysis power*  
476 *analysis* suggested a low likelihood of detecting an effect of higher cut-in speeds with either the non-  
477 linear categorical or linear continuous models, likely requiring around 25 additional studies at higher cut-

478 in speeds to precisely measure the effect. While *a posteriori* power analyses, such as this scenario, are  
479 redundant with the statistical test on which they are based, these tests can still be useful for evaluating  
480 study success and determining how much additional sampling effort is required [32].

481           However, as the current knowledge scenario parameter estimates are not precisely measured, the  
482 *a priori* scenarios provide additional guidance on what effects are observable consistently within the  
483 current analytical framework. At the current sample size, we have the power to detect differences in the  
484 categorical framework at  $\Delta 2$  m/s for the scenarios with the highest magnitude decrease (25% linear and  
485 50% exponential) and detect linear trends for these same scenarios as well as the 50% initial decline/10%  
486 long-term decline scenario. Given the lack of effects detected in the *meta-analysis* using the categorical  
487 model (at higher  $\Delta$  cut-in speeds), and the marginal effects detected in the linear model, it is unlikely that  
488 the 25% linear or 50% exponential decrease scenarios represent the true effect. Thus, a smaller decrease is  
489 more likely, though more data are needed to measure the effect precisely.

490           It is unlikely that fatality reduction and absolute cut-in speed are linearly related, as there is a high  
491 potential for varying effects across sites [5,39], but control cut-in speed was not an important predictor in  
492 our models, suggesting that the RR approach was effective in standardizing effect sizes across studies.  
493 Neither rotor diameter nor geographic region explained much variation in RR, which may relate to the  
494 scale of the variable; in ecoregion, just three broad geographic areas were used due to sample size  
495 limitations. Previous research has also indicated that bat fatalities increased exponentially with tower  
496 height [8,40], suggesting that more research is needed on the importance of turbine dimensions. Bat  
497 mortality risk has also previously been related to habitat characteristics such as forested areas, slope,  
498 temperature, and humidity [41,42], and mountain ridges have been recognized as important during  
499 migration [43]. If more studies are completed across a wider range of study conditions, then detecting  
500 sources of fatality reduction variation would be more effective. Testing curtailment efficacy at locations  
501 with lower overall fatality rates could also be instructive and curtailment studies are suggested for sites  
502 that typically have high enough fatality rates to elicit conservation concern.

503           Differentiation of fatality rates by species or species group could also help reduce our uncertainty.  
504   Species-level traits such as migratory strategy, dispersal distance, and habitat association likely play an  
505   important role in fatality risk [44]. For instance, long-distance migrants such as hoary bats, silver-haired  
506   bats, and eastern red bats comprise a majority of fatalities at terrestrial wind energy facilities in North  
507   America [3,8]. The project-specific risk is then correlated to species distributions, migratory routes, and  
508   flight heights, among other characteristics [45]. Incorporating species-level information could improve  
509   our understanding of bat fatality reduction, but this would require that species-level fatality estimates, or  
510   at least species-group fatality estimates (i.e., migratory tree bats vs. *Myotis* spp.), be reported from  
511   curtailment studies to allow for comparisons. Such estimates were not consistently reported by the studies  
512   included in our analysis, often due to insufficient sample size.

513           The precision of *meta-analysis* parameters is likely to be overestimated in this study. While the  
514   random effects meta-analysis framework adds uncertainty to model estimates based on among-study  
515   variance [24], we did not account for site dependence as modeling approaches yielded unstable results.  
516   Additionally, turbine operation, mortality estimator selection, and blanket curtailment implementation  
517   varies substantially between sites (including time of year, time of night, species composition affected,  
518   choice of cut-in speed, and turbine feathering), and these differences could affect the results in ways that  
519   are difficult to incorporate into meta-analyses due to incomplete documentation of these protocols. While  
520   we controlled for some of these potential biases by including variables like control cut-in speed and multi-  
521   treatment controls, the remaining uncertainties will likely be reduced best with increased sample size or  
522   protocol documentation.

### 523   *Recommendations for future studies*

524           If blanket curtailment greater than 1.5 m/s above manufacturer specifications continues to be  
525   implemented at wind facilities, additional experiments should be conducted to understand the relative  
526   benefit of these increased cut-in speeds for reducing bat fatalities. The number of studies that tested  $\Delta$  cut-  
527   in speeds greater than 1.5 m/s were relatively few, and more studies that target these larger changes are

528 needed. Estimates from the *meta-analysis power analysis* suggest that as many as 25 additional studies at  
529  $\Delta 2$  m/s cut-in speed would be needed to effectively exclude the possibility of a 20% reduction in fatality  
530 (and even more are needed to detect an additional 10% reduction). Conducting studies that compare  
531 multiple treatment groups against a control during the same time period at the same location would  
532 provide greater inferential power to answer such questions; though the costs of each individual study  
533 would increase compared to single treatment studies, more could be gained in terms of understanding the  
534 benefits of higher  $\Delta$  cut-in speeds. At the individual study level, statistical power is dependent on many  
535 factors outside of the control of study designers (e.g., fatality rates and carcass persistence). Prior  
536 knowledge of these parameters is valuable for designing effective studies, particularly if carcass  
537 persistence rates are expected to be lower than average (e.g., due to high scavenging activity at the site).

538 To facilitate inclusion of studies in future meta-analyses, curtailment experiments should report  
539 fatality estimates for both control and treatment groups, carcass persistence rates, searcher efficiency,  
540 search frequency, search area coverage, number of turbine-nights of study, curtailment regime (including  
541 whether feathering occurred), and turbine makes/models, with associated uncertainty values when  
542 relevant. When sample size allows, fatality estimates should be reported by species or species group (e.g.,  
543 *Myotis*) rather than for all bat species combined to facilitate taxon-specific assessments of curtailment  
544 efficacy.

545 Newer operational minimization strategies have been developed to achieve similar fatality  
546 reductions as blanket curtailment but with lower energy loss at higher cut-in speeds [46,47]. “Smart”  
547 curtailment strategies, for example, which use additional environmental data besides wind speed to  
548 inform the assessment of mortality risk and vary curtailment implementation, show promise to reduce the  
549 economic impact of curtailment on wind energy projects [48–50]. Several deterrent systems that  
550 discourage bats from approaching turbines are also in development and show some promise for reducing  
551 fatalities while minimizing power loss [11,50–52], and could be particularly beneficial if used in  
552 combination with curtailment at lower wind speeds. While such approaches are still being evaluated, they



553 may eventually represent a more cost-effective alternative to blanket curtailment, particularly blanket  
554 curtailment at higher wind speeds.

### 555 *Conclusions*

556 The results of our *meta-analysis* suggest that blanket curtailment is effective at reducing bat  
557 fatalities at terrestrial wind energy facilities, with the meta-analysis describing a mean fatality ratio of  
558 0.44, or a 68% reduction in bat fatalities. Given our small sample size, particularly at higher  $\Delta$  cut-in  
559 speeds, our statistical power was limited to test the benefit of increasing cut-in speeds more than 1-1.3  
560 m/s above the control cut-in speed. The power analysis suggests that differences in fatality ratio of 50% or  
561 greater were often detectable even with small sample sizes (> 80% chance of significance), so it is likely  
562 that the true value of incremental increases in  $\Delta$  cut-in speed is below this 50% threshold. Whitby et al.  
563 [37] suggest this is the case and that result combined with our marginally important effect in this study  
564 provides more evidence that higher cut-in speeds can yield fewer mortalities. Though the small sample  
565 sizes, low power in the present study, and variation in our respective results should engender caution  
566 when interpreting these findings. Given the scope of bat fatalities at terrestrial wind farms in North  
567 America [3,53], we must learn more about the management effectiveness of curtailment, particularly at  
568 larger  $\Delta$  cut-in speeds. Further development of “smart” curtailment strategies may also reduce fatalities  
569 while moderating impacts to project finances [49].

570 The number of available studies in the current analysis limited our analytical options and findings  
571 in several ways. If blanket curtailment continues to be a common strategy at wind speeds at  $\sim 5$  m/s or  
572 above (i.e.,  $\Delta$  cut-in speed of  $> 1.5$  with a standard factory cut-in speed of 3.5 m/s), we would recommend  
573 conducting additional experimental curtailment studies with blanket curtailment treatments at these higher  
574 cut-in speeds to strengthen our understanding of the relationship between increasing cut-in speeds and bat  
575 fatality rates. Such studies must be carefully designed, ideally using an adaptive management framework  
576 [54], to consider such variables as the expected fatality rate and carcass persistence rate when selecting a  
577 search interval and defining the number of turbine-nights to monitor. Studies at sites with expected low



578 fatality rates and low carcass persistence, in particular, must be carefully designed, and power analyses  
579 are an important tool to ensure adequate statistical power to detect changes across treatment and control  
580 groups. While such studies would improve our understanding of the relationship between fatality and cut-  
581 in speed, given the results of our power analysis, a large number of these studies may be required to  
582 develop reliable estimates across sites for larger  $\Delta$  cut-in speeds. While this could be costly, the potential  
583 effect of increasing cut-in speed on bat mortality could be ecologically important for species of  
584 conservation concern.

585

### 586 **Acknowledgments**

587 The authors are grateful to the Wind Wildlife Research Fund for providing financial support to make this  
588 work possible. The American Wind Wildlife Institute provided valuable feedback on earlier drafts of this  
589 manuscript along with four anonymous reviewers. We want to thank the American Wind Wildlife  
590 Information Center (AWWIC) database manager, Ryan Butryn, for data collation and management, and  
591 the AWWI project managers for logistical support and input on the draft report. We would also like to  
592 thank all the data contributors who conducted curtailment studies and made the data available for this  
593 meta-analysis.

594

## 595 Literature Cited

- 596 1. Arnett EB, Huso MMP, Schirmacher MR, Hayes JP. Altering turbine speed reduces bat mortality  
597 at wind-energy facilities. *Front Ecol Environ*. 2011;9: 209–214. doi:10.1890/100103
- 598 2. Arnett EB, Baerwald EF. Impacts of wind energy development on bats: Implications for  
599 conservation. In: Adams RA, Pedersen SC, editors. *Bat Evolution, Ecology, and Conservation*.  
600 New York, New York: Springer Science+Business Media; 2013. pp. 435–456. doi:10.1007/978-1-  
601 4614-7397-8
- 602 3. Zimmerling JR, Francis CM. Bat mortality due to wind turbines in Canada. *J Wildl Manage*.  
603 2016;80: 1360–1369. doi:10.1002/jwmg.21128
- 604 4. Cryan PM, Barclay RM. Causes of bat fatalities at wind turbines: hypotheses and predictions. *J*  
605 *Mammal*. 2009;90: 1330–1340.
- 606 5. Cryan PM, Gorresen PM, Hein CD, Schirmacher MR, Diehl RH, Huso MM, et al. Behavior of  
607 bats at wind turbines. *Proc Natl Acad Sci*. 2014;111: 15126–15131. doi:10.1073/pnas.1406672111
- 608 6. Baerwald EF, Edworthy J, Holder M, Barclay RMR. A Large-Scale Mitigation Experiment to  
609 Reduce Bat Fatalities at Wind Energy Facilities. *J Wildl Manage*. 2009;73: 1077–1081.  
610 doi:10.2193/2008-233
- 611 7. Arnett EB, Baerwald EF. Impacts of Wind Energy Development on Bats: Implications for  
612 Conservation. In: Adams RA, Pedersen SC, editors. *Bat Evolution, Ecology, and Conservation*.  
613 New York, NY: Springer Science+Business Media; 2013. pp. 435–456. doi:10.1007/978-1-4614-  
614 7397-8
- 615 8. American Wind Wildlife Institute. A summary of bat fatality data in a nationwide database.  
616 Washington D.C. 41 pp.; 2019. Available: [www.awwi.org](http://www.awwi.org)
- 617 9. Kunz TH, Arnett EB, Cooper BM, Erickson WP, Larkin RP, Mabee T, et al. Assessing impacts of  
618 wind-energy development on nocturnally active birds and bats: A guidance document. *J Wildl*  
619 *Manage*. 2007;71: 2449–2486. doi:10.2193/2007-270
- 620 10. Frick WF, Baerwald EF, Pollock JF, Barclay RM., Szymanski JA, Weller TJ, et al. Fatalities at  
621 wind turbines may threaten population viability of a migratory bat. *Biol Conserv*. 2017;209: 172–  
622 177.
- 623 11. Arnett EB, Johnson GD, Erickson WP, Hein CD. A synthesis of operational mitigation studies to  
624 reduce bat fatalities at wind energy facilities in North America. National Renewable Energy  
625 Laboratory. *Bat Conservation International*, Austin, Texas. 37 pp.; 2013.
- 626 12. Baerwald EF, Edworthy J, Holder M, Barclay RMR. A large-scale mitigation experiment to  
627 reduce bat fatalities at wind energy facilities. *J Wildl Manage*. 2009;73: 1077–1081.
- 628 13. Arnett EB, Huso MMP, Hayes JP, Schirmacher M. Effectiveness of changing wind turbine cut-in  
629 speed to reduce bat fatalities at wind facilities. *Bats and Wind Energy Cooperative, Bat*  
630 *Conservation International*, Austin, Texas. 57 pp.; 2010.
- 631 14. Canadian Wind Energy Association. Wind energy and bat conservation – A review by the  
632 Canadian Wind Energy Association. DNVGL. Hovik, Norway. 253 pp.; 2018. Available:  
633 <https://canwea.ca/wp-content/uploads/2018/08/windenergyandbatconservationreview.pdf>
- 634 15. American Wind Wildlife Institute. *Bats and wind energy: Impacts, mitigation, and tradeoffs*.  
635 Washington D.C. 42 pp.; 2018.

- 636 16. Gurevitch J, Koricheva J, Nakagawa S, Stewart G. Meta-analysis and the science of research  
637 synthesis. *Nature*. 2018;555: 175–182. doi:10.1038/nature25753
- 638 17. R Core Team. R: a language and environment for statistical computing. Vienna, Austria.  
639 <http://www.r-project.org>: R Foundation for Statistical Computing; 2020. Available: [http://www.r-](http://www.r-project.org)  
640 [project.org](http://www.r-project.org)
- 641 18. Huso M, Dalthorp D, Miller TJ, Bruns D. Wind energy development: methods to assess bird and  
642 bat fatality rates post- construction. *Human-Wildlife Interact*. 2016;10: 62–70.
- 643 19. Bernardino J, Bispo R, Costa H, Mascarenhas M. Estimating bird and bat fatality at wind farms: a  
644 practical overview of estimators, their assumptions and limitations. *New Zeal J Zool*. 2013;40: 63–  
645 74. doi:10.1080/03014223.2012.758155
- 646 20. Huso MMP. An estimator of wildlife fatality from observed carcasses. *Environmetrics*. 2011;22:  
647 318–329. doi:10.1002/env.1052
- 648 21. Shoenfeld PS. Suggestions regarding avian mortality extrapolation. West Virginia Highl Conserv.  
649 Davis, West Virginia. 6 pp.; 2004. Available:  
650 <http://www.wvhighlands.org/Birds/SuggestionsRegardingAvianMortalityExtrapolation.pdf>
- 651 22. Erickson WP, Strickland MD, Johnson GD, Kern JW. Examples of statistical methods to assess  
652 risk of impacts to birds from wind plants. *Proceedings of National Avian-Wind Power Planning*  
653 *Meeting III*. King City, Ontario.; 1998. pp. 172–182.
- 654 23. Ontario Ministry of Natural Resources. Bats and bat habitats: guidelines for wind power projects.  
655 Ontario, Canada. 24 pp.; 2011. Available:  
656 [https://tethys.pnnl.gov/sites/default/files/publications/Ontario\\_Ministry\\_of\\_Natural\\_Resources\\_20](https://tethys.pnnl.gov/sites/default/files/publications/Ontario_Ministry_of_Natural_Resources_2011.pdf)  
657 [11.pdf](https://tethys.pnnl.gov/sites/default/files/publications/Ontario_Ministry_of_Natural_Resources_2011.pdf)
- 658 24. Viechtbauer W. Conducting meta-analyses in R with the metafor. *J Stat Softw*. 2010;36: 1–48.  
659 doi:10.18637/jss.v036.i03
- 660 25. Cox C. Delta Method. *Encycl Biostat*. 2005; 2.
- 661 26. Lajeunesse MJ. On the meta-analysis of response ratios for studies with correlated and multi-  
662 group design. *Ecology*. 2011;92: 2049–2055.
- 663 27. Han B, Duong D, Sul J, de Bakker P, Raychaudhuri S. A general framework for meta-analyzing  
664 dependent studies with overlapping subjects in association mapping. *Hum Mol Genet*. 2016;25:  
665 1857–1866.
- 666 28. Schwarzer G. meta: An R package for meta-analysis. *R News*. 2007;7: 40–45.
- 667 29. Veroniki A, Jackson D, Viechtbauer W, Bender R, J B, G K, et al. Methods to estimate the  
668 between-study variance and its uncertainty in meta-analysis. *Res Synth Methods*. 2016;7: 55–79.
- 669 30. Higgins JPT, Thompson SG, Deeks JJ, Altman DG. Measuring inconsistency in meta-analyses. *Br*  
670 *Med J*. 2003;327: 557–560. doi:10.1136/bmj.327.7414.557
- 671 31. Arnold BF, Hogan DR, Colford Jr. JM, Hubbard AE. Simulation methods to estimate design  
672 power: an overview for applied research. *BMC Med Res Methodol*. 2011;11: 94.
- 673 32. Gelman A, Carlin J. Beyond power calculations: assessing Type S (Sign) and Type M  
674 (Magnitude) errors. *Perpectives Psychol Sci*. 2014;9: 641–651.
- 675 33. Kery MA, Royle JA. Applied hierarchical modeling in ecology: Analysis of distribution,

- 676 abundance and species richness in R and BUGS. London: Academic Press; 2016.
- 677 34. Brilleman S. simsurv: Simulate Survival Data. <https://cran.r-project.org/package=simsurv>: R  
678 package version 0.2.3; 2019. Available: <https://cran.r-project.org/package=simsurv>
- 679 35. Dalthorp D, Simonis J, Madsen L, Huso M, Rabie P, Minz J, et al. GenEst: Generalized Mortality  
680 Estimator. <https://cran.r-project.org/package=GenEst>: R package version 1.2.3; 2019. Available:  
681 <https://cran.r-project.org/package=GenEst>
- 682 36. Arnett EB, Johnson GD, Erickson WP, Hein CD. A Synthesis of Operational Mitigation Studies to  
683 Reduce Bat Fatalities at Wind Energy Facilities in North America. Austin, TX; 2013.  
684 doi:10.1016/j.jallcom.2014.09.009
- 685 37. Whitby MD, Schirmacher MR, Frick WF. The State of the Science on Operational Minimization  
686 to Reduce Bat Fatality at Wind Energy Facilities. A Rep Submitt to Natl Renew Energy Lab.  
687 Austin, Texas; 2021.
- 688 38. Bulling L, Köppel J. Exploring the trade-offs between wind energy and biodiversity conservation.  
689 In: Geneletti D, editor. Handbook on Biodiversity and Ecosystem Services in Impact Assessment.  
690 2016. p. 299.
- 691 39. Horn JW, Arnett EB, Kunz TH. Behavioral responses of bats to operating wind turbines. *J Wildl*  
692 *Manage*. 2008;72: 123–132. doi:10.2193/2006-465
- 693 40. Barclay RMR, Baerwald EF, Gruver JC. Variation in bat and bird fatalities at wind energy  
694 facilities: assessing the effects of rotor size and tower height. *Can J Zool*. 2007;85: 381–387.  
695 doi:10.1139/Z07-011
- 696 41. Santos H, Rodrigues L, Jones G, Rebelo H. Using species distribution modelling to predict bat  
697 fatality risk at wind farms. *Biol Conserv*. 2013;157: 178–186. doi:10.1016/j.biocon.2012.06.017
- 698 42. Rydell J, Bach L, Dubourg-Savage M-J, Green M, Rodrigues L, Hedenström A. Bat mortality at  
699 wind turbines in northwestern Europe. *Acta Chiropterologica*. 2010;12: 261–274.  
700 doi:10.3161/150811010x537846
- 701 43. Baerwald EF, Barclay RMR. Geographic variation in activity and fatality of migratory bats at  
702 wind energy facilities. *J Mammal*. 2009;90: 1341–1349. doi:10.1644/09-mamm-s-104r.1
- 703 44. Thaxter CB, Buchanan GM, Carr J, Butchart SHM, Newbold T, Green RE, et al. Bird and bat  
704 species' global vulnerability to collision mortality at wind farms revealed through a trait-based  
705 assessment. *Proc R Soc B Biol Sci*. 2017;284. doi:10.1098/rspb.2017.0829
- 706 45. Roemer C, Disca T, Coulon A, Bas Y. Bat flight height monitored from wind masts predicts  
707 mortality risk at wind farms. *Biol Conserv*. 2017;215: 116–122. doi:10.1016/j.biocon.2017.09.002
- 708 46. Arnett E, Hein C, Schirmacher M, Huso M, Szewczak J. Correction: evaluating the effectiveness  
709 of an ultrasonic acoustic deterrent for reducing bat fatalities at wind turbines. *PLoS One*. 2013;8:  
710 10.1371/annotation/a81f59cb-0f82-4c84-a743-895acb4.
- 711 47. Behr O, Brinkmann R, Hoehradel K, Mages J, Korner-Nievergelt F, Niermann I, et al. Mitigating  
712 bat mortality with turbine-specific curtailment algorithms: A model based approach. *Wind Energy*  
713 *and Wildlife Interactions*. Springer; 2017. pp. 135–160.
- 714 48. Martin CM, Arnett EB, Stevens RD, Wallace MC. Reducing bat fatalities at wind facilities while  
715 improving the economic efficiency of operational mitigation. *J Mammal*. 2017;98: 378–385.
- 716 49. Hayes MA, Hooton LA, Gilland KL, Grandgent C, Smith RL, Lindsay SR, et al. A smart

- 717 curtailment approach for reducing bat fatalities and curtailment time at wind energy facilities. *Ecol*  
718 *Appl.* 2019;29: 1–18. doi:10.1002/eap.1881
- 719 50. Weaver SP. Understanding Wind Energy Impacts to Bats and Testing Reduction Strategies in  
720 South Texas. Texas State University. 2019. Available:  
721 <https://digital.library.txstate.edu/handle/10877/8463>
- 722 51. Johnson JB, Ford WM, Rodrigue JL, Edwards JW. Effects of acoustic deterrents on foraging bats.  
723 Res Note NRS-129. Newtown Square, PA. 5 pp.: U.S. Department of Agriculture, Forest Service,  
724 Northern Research Station; 2012. Report No.: Res. Note NRS-129.
- 725 52. Romano WB, Skalski JR, Townsend RL, Kinzie KW, Coppinger KD, Miller MF. Evaluation of an  
726 acoustic deterrent to reduce bat mortalities at an Illinois wind farm. *Wildl Soc Bull.* 2019;43: 608–  
727 618. doi:10.1002/wsb.1025
- 728 53. Hayes MA. Bats killed in large numbers at United States wind energy facilities. *Bioscience.*  
729 2013;63: 975–979. doi:10.1093/biosci/biu056
- 730 54. Williams BK. Adaptive management of natural resources—framework and issues. *J Environ*  
731 *Manage.* 2011;92: 1346–1353.  
732

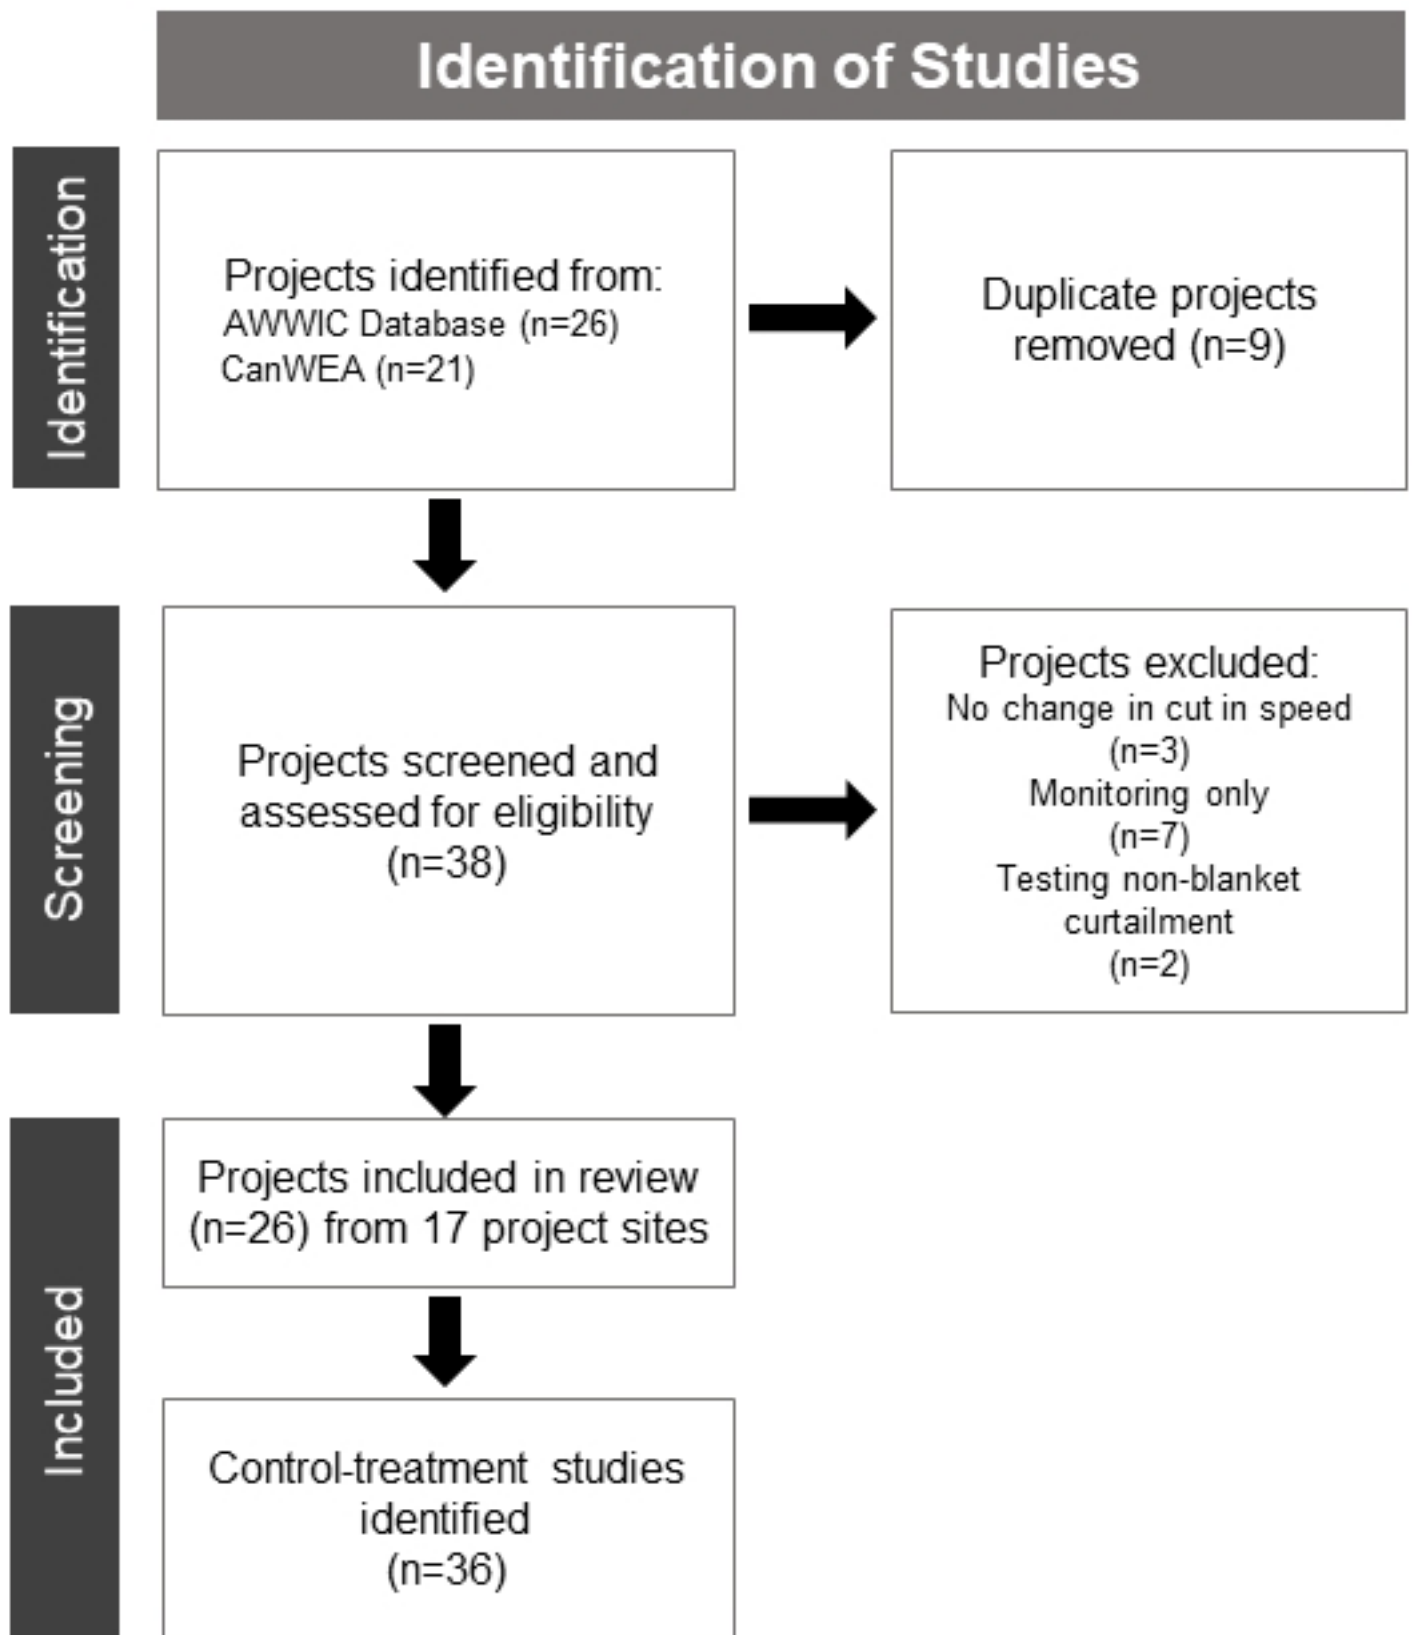

Figure 1





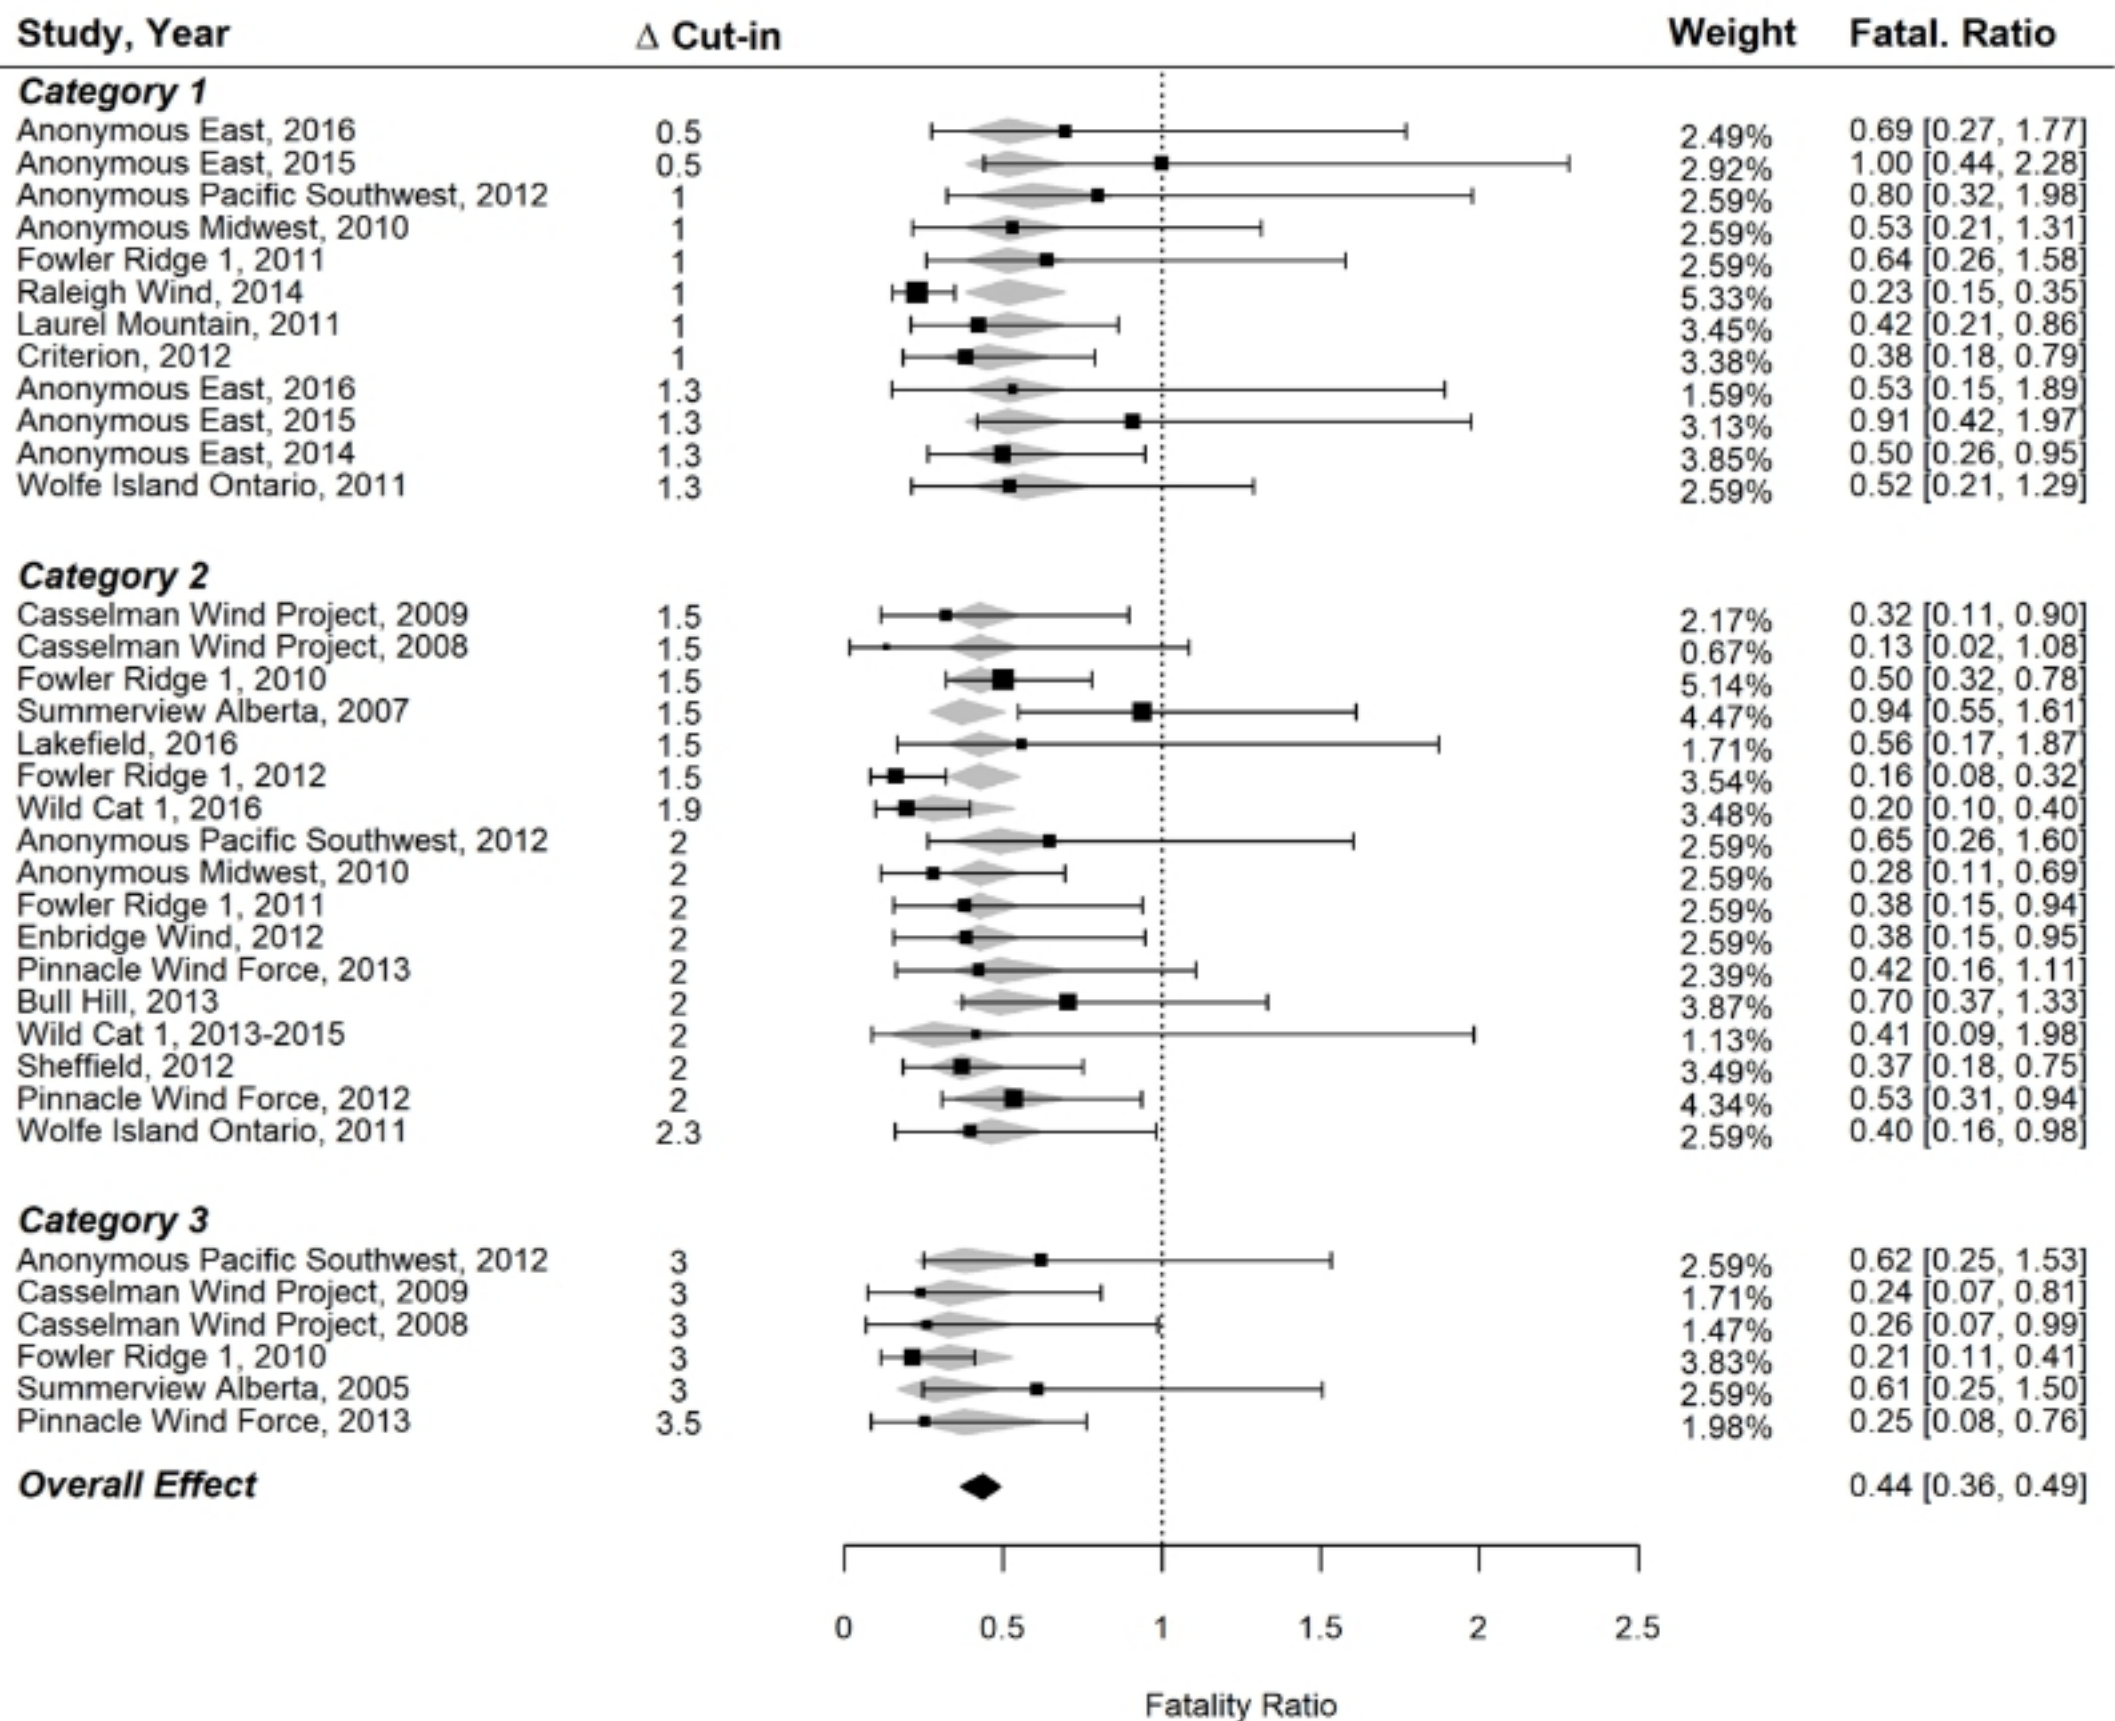

Figure 3



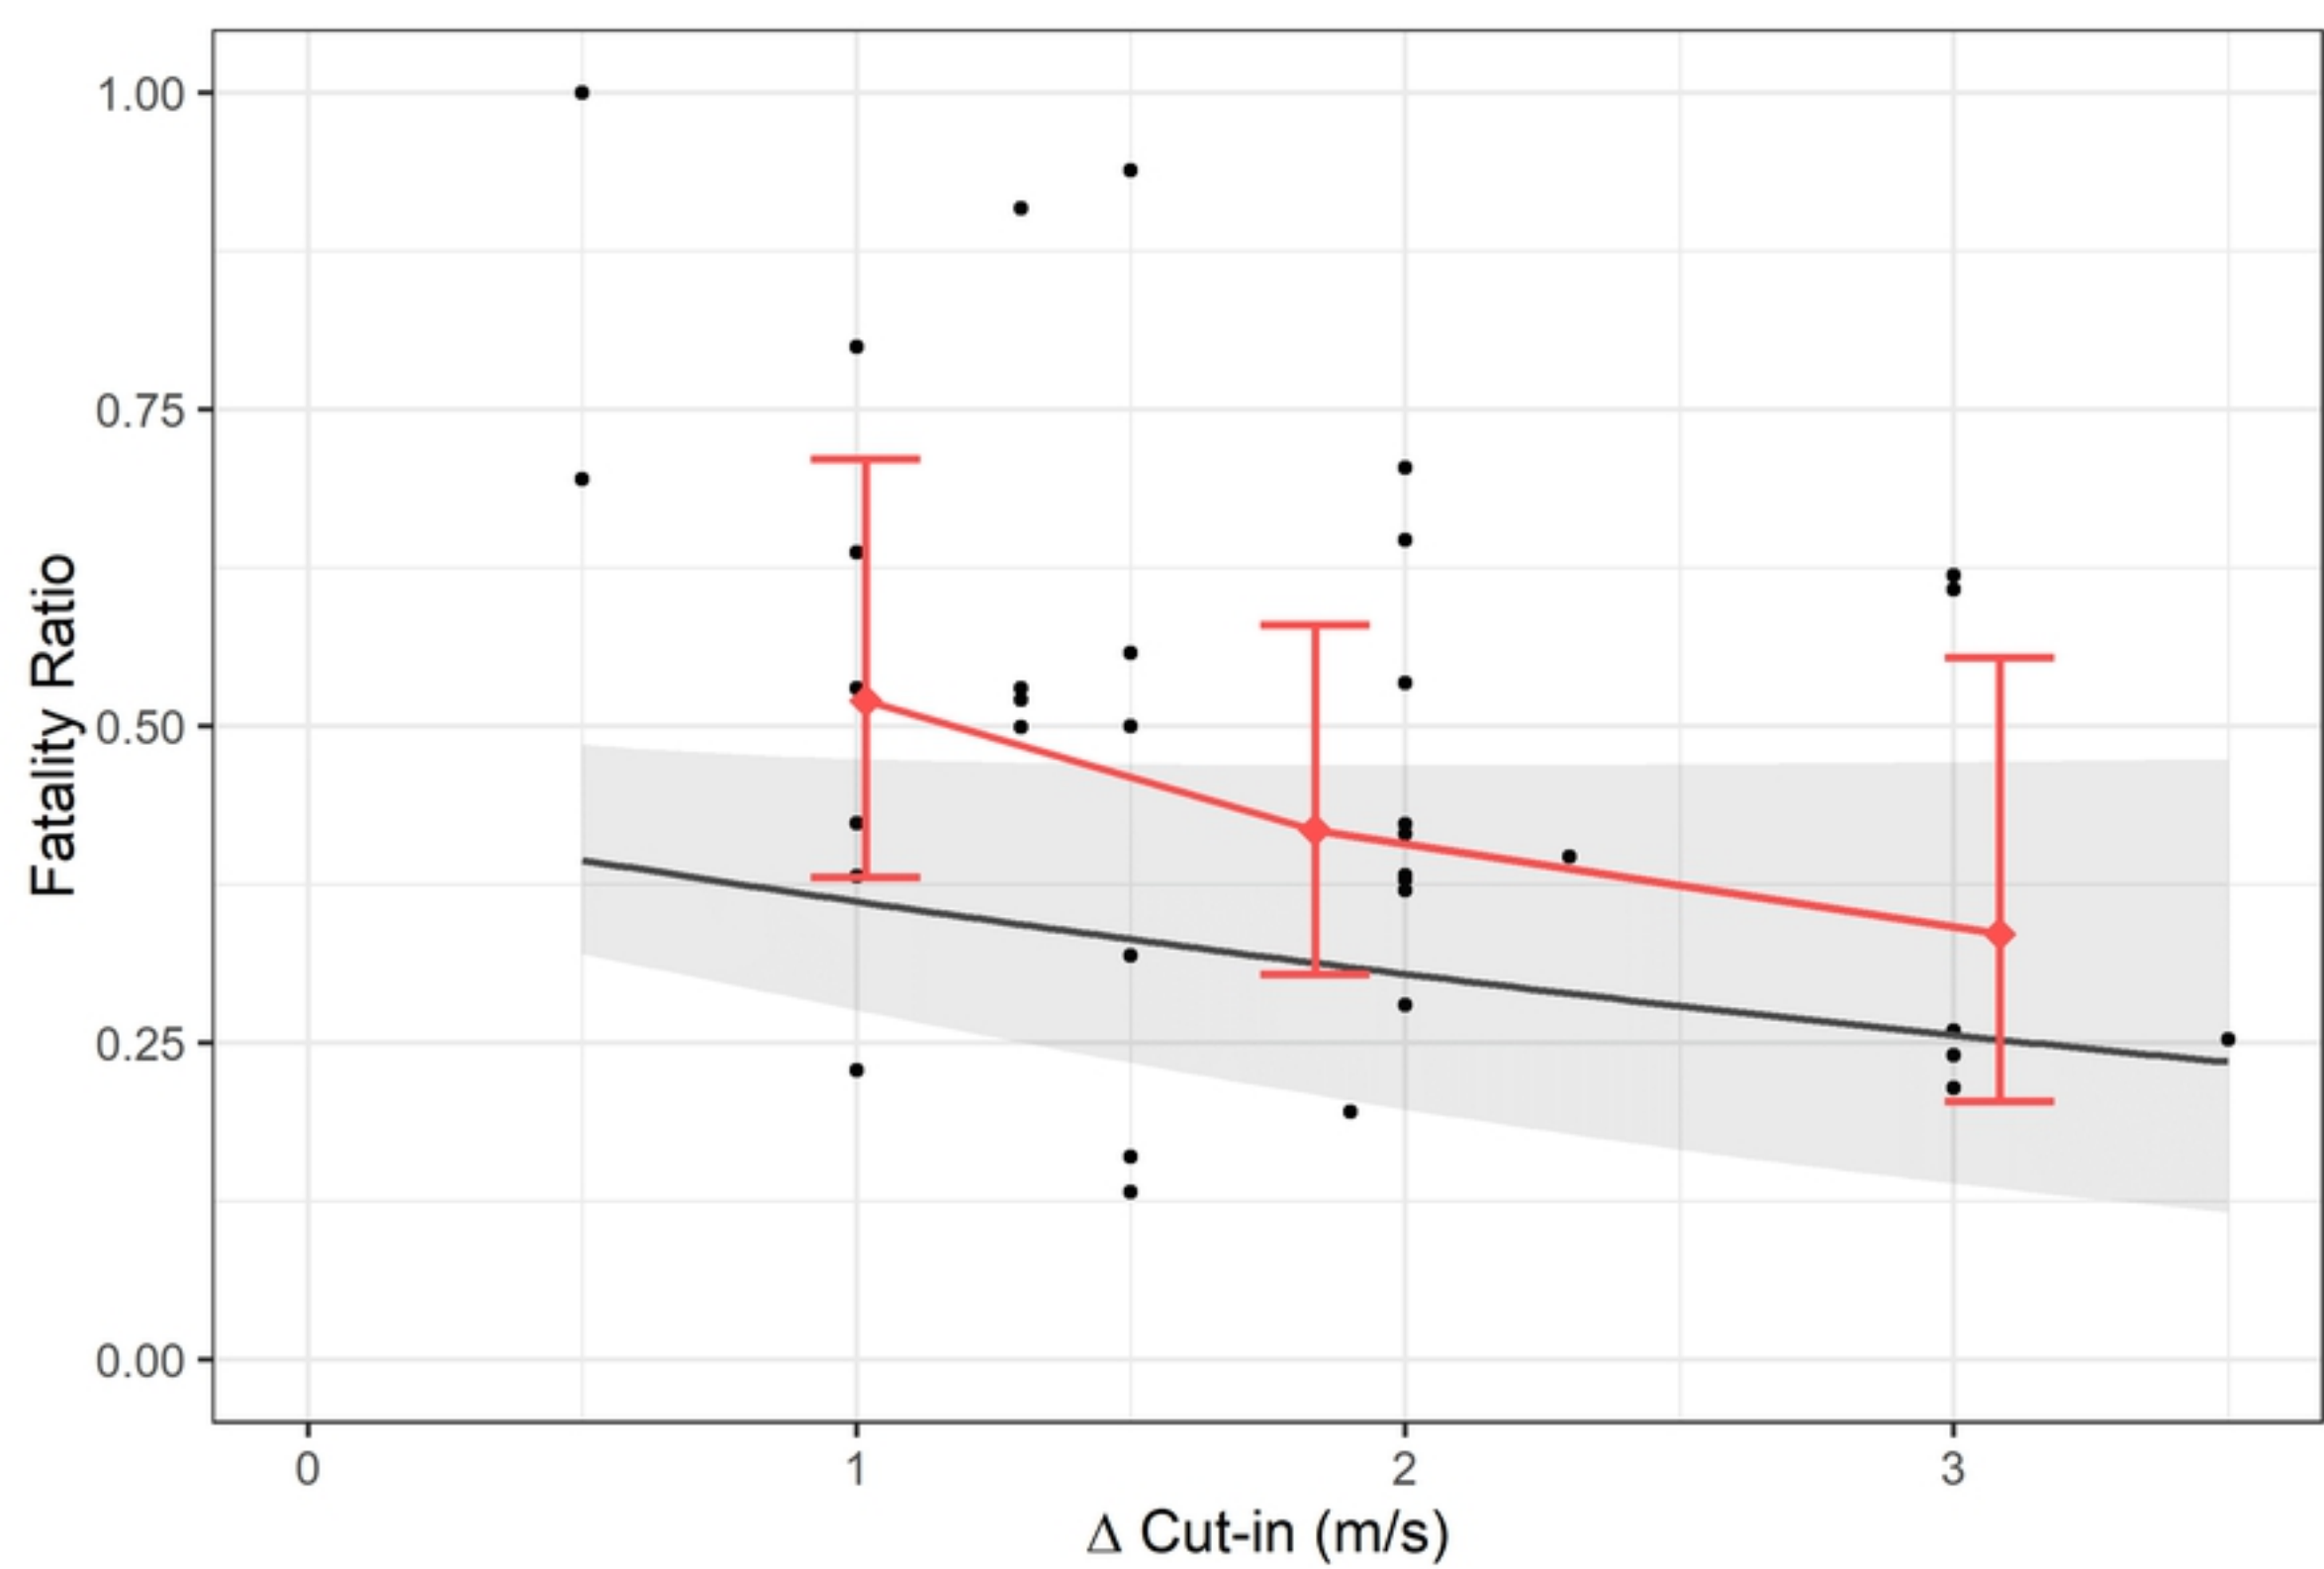

Figure 4

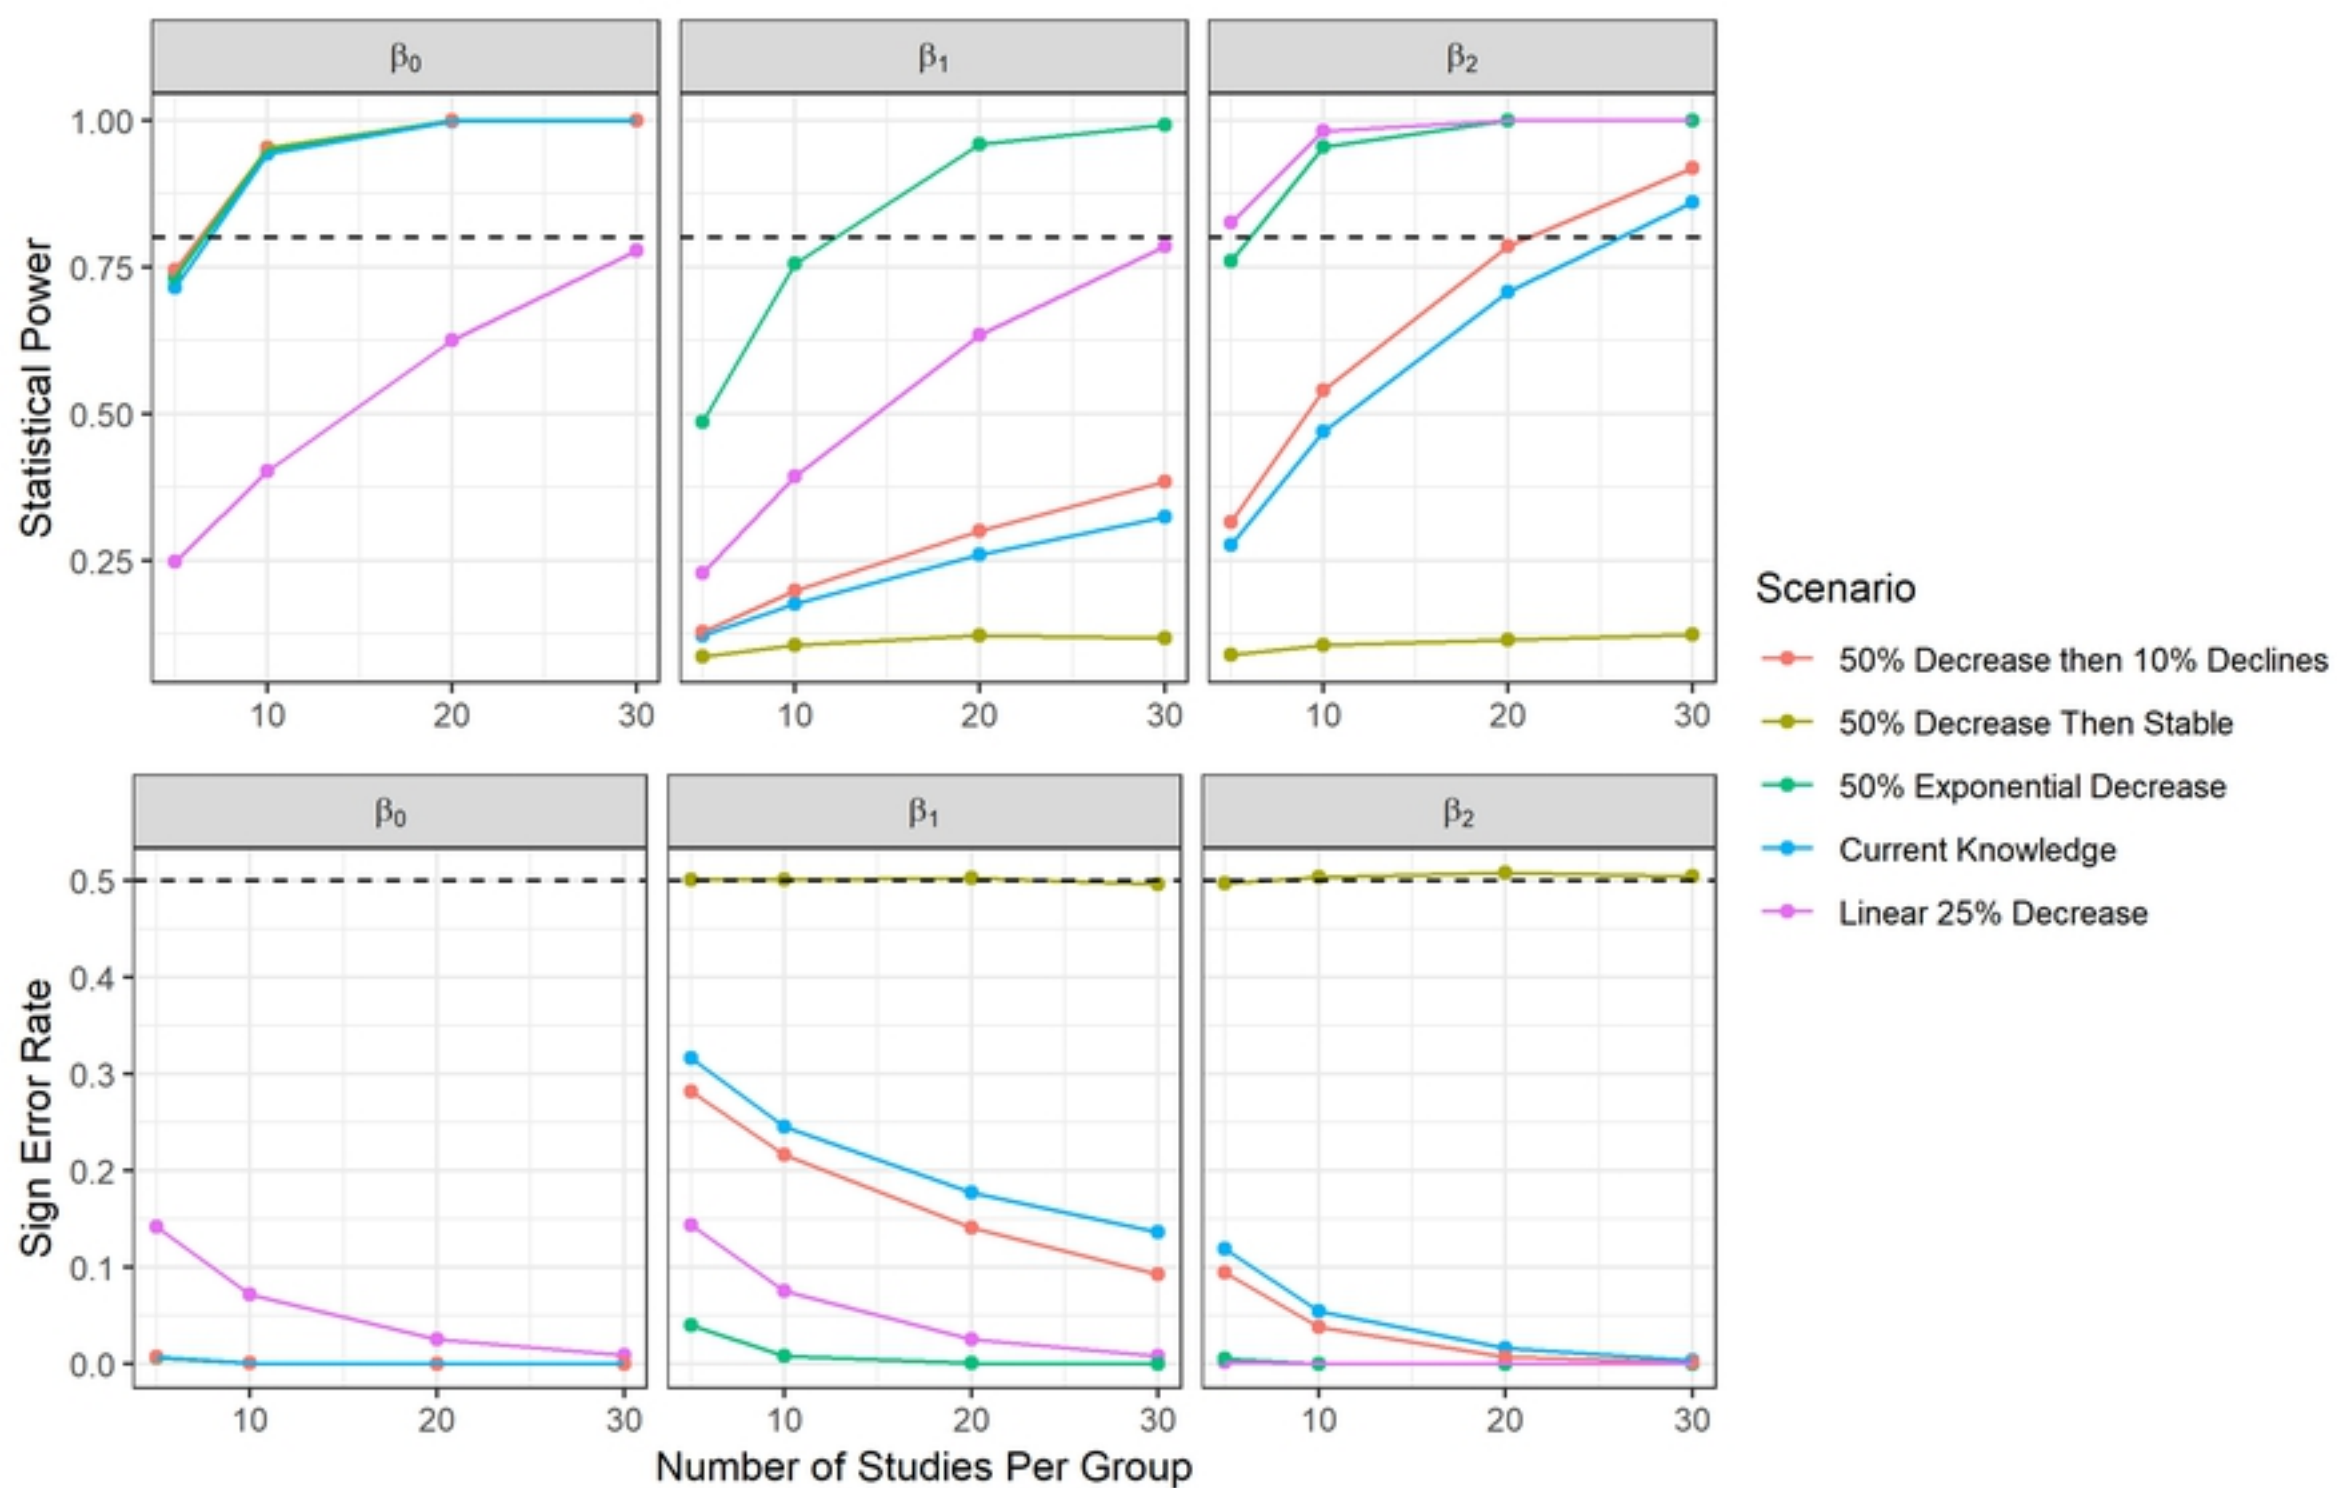

Figure 5

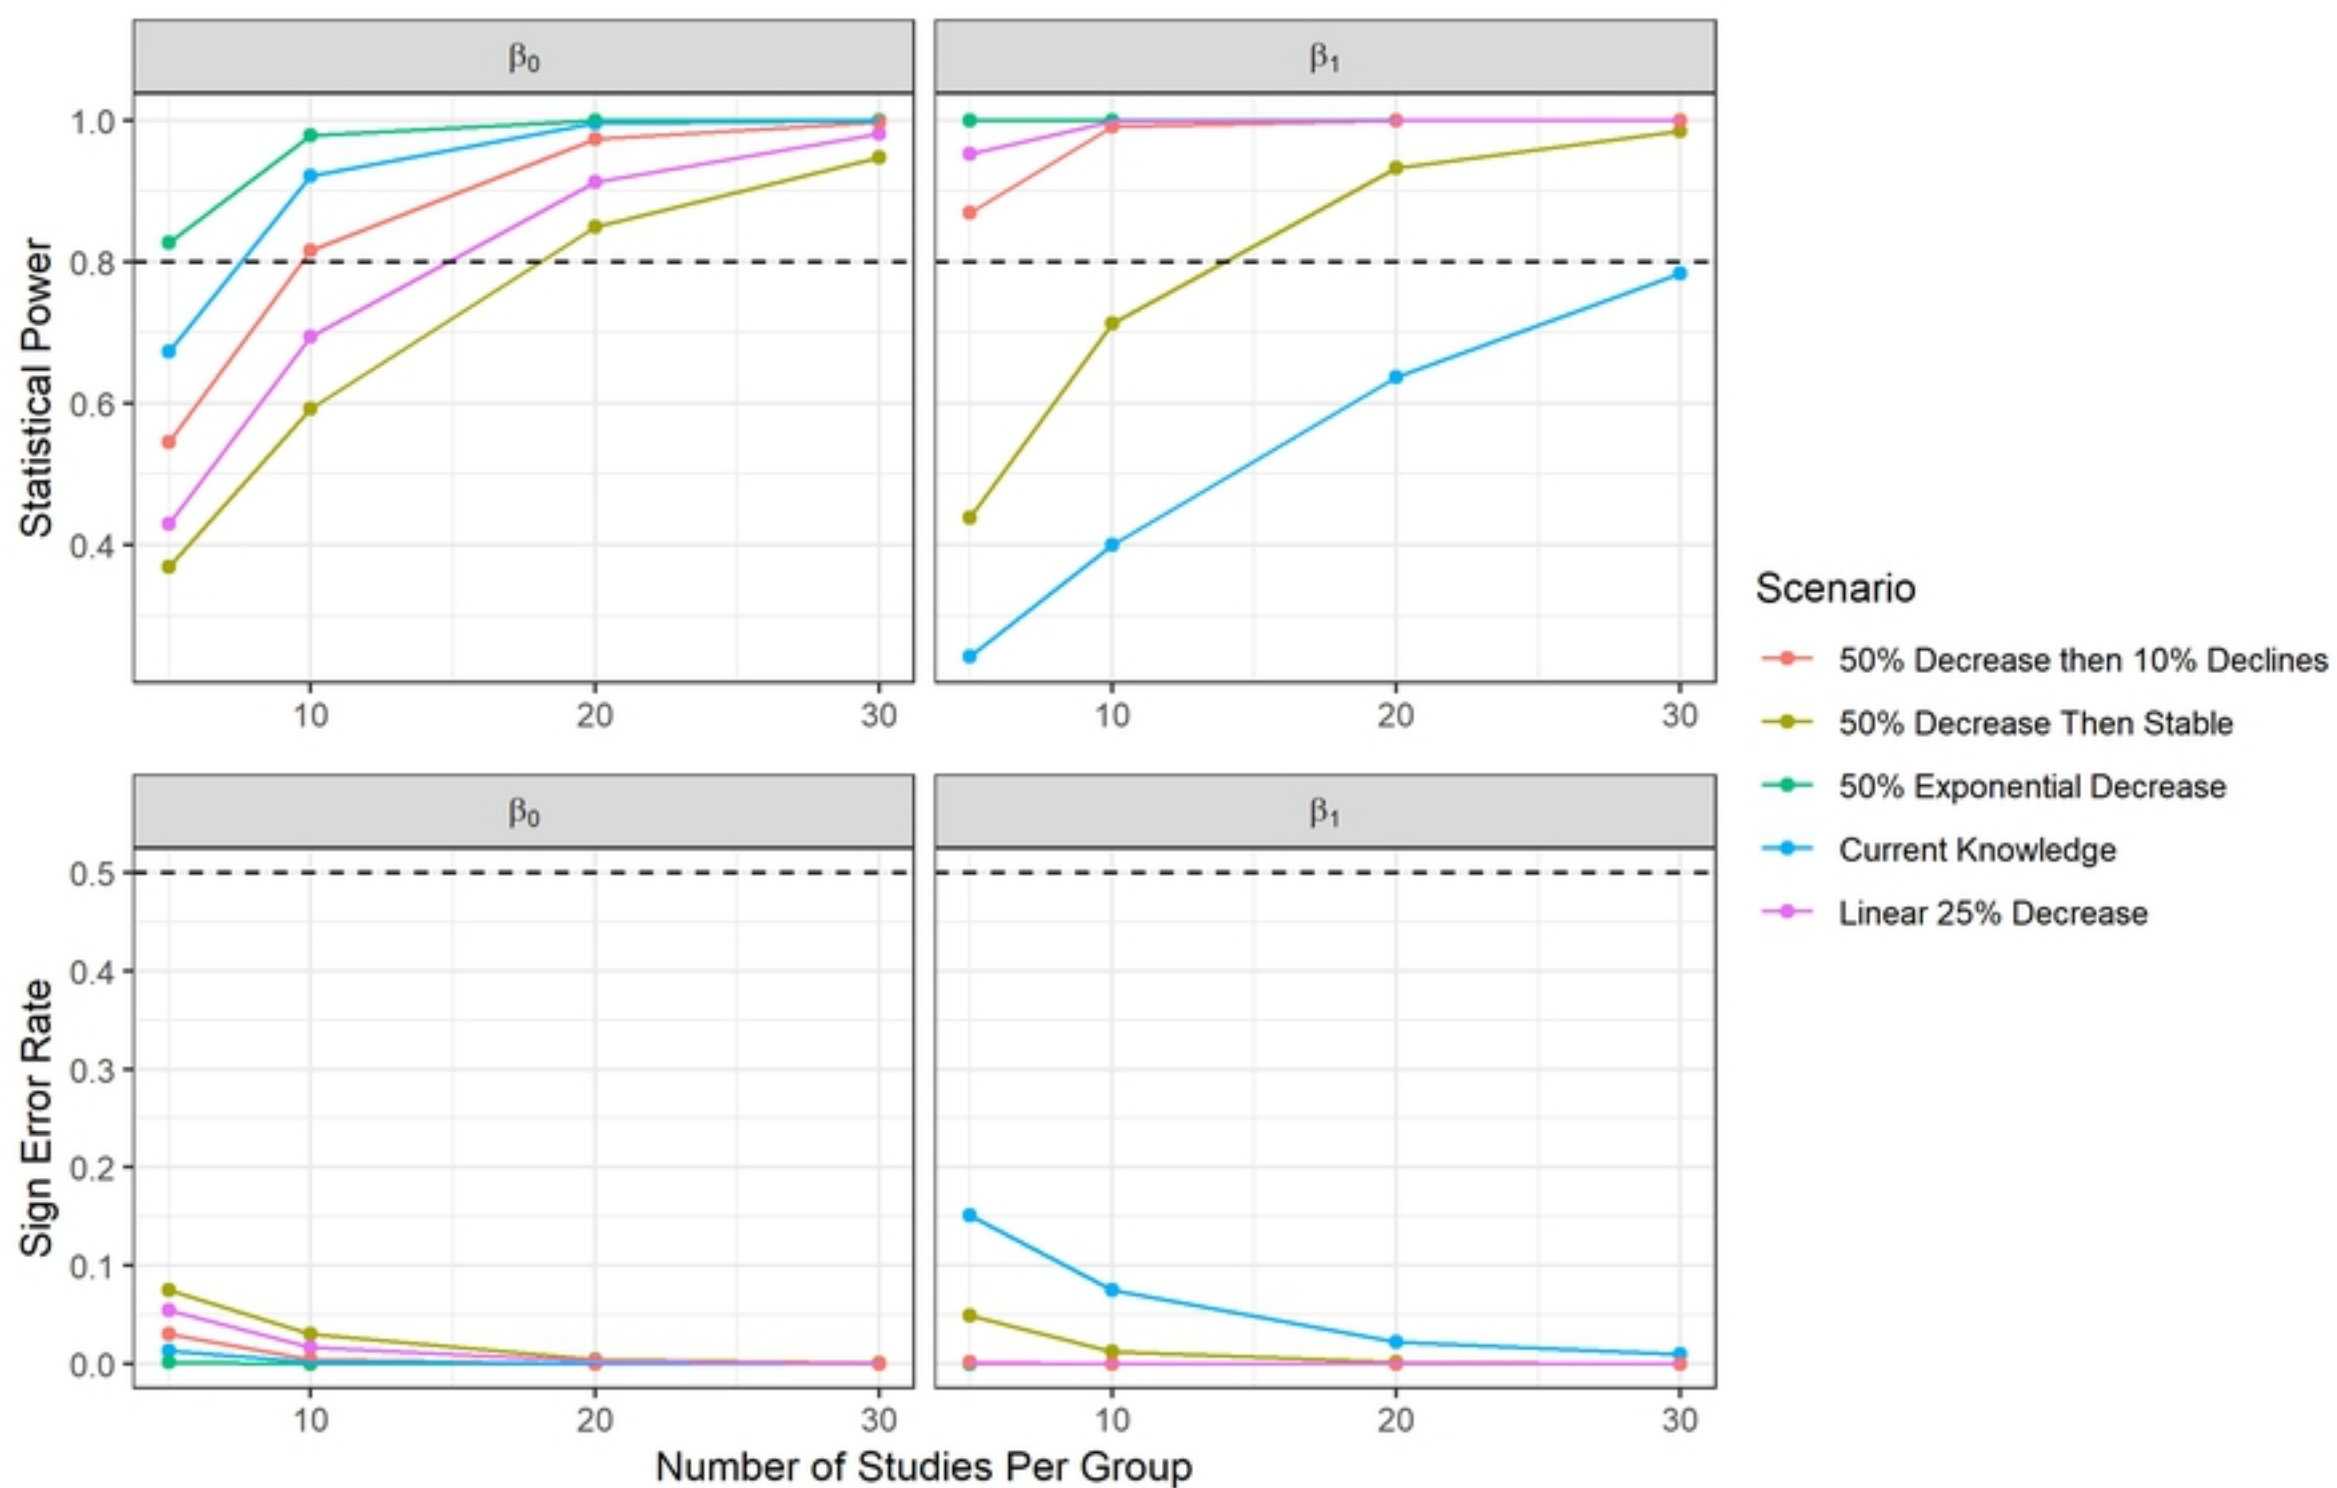

Figure 6

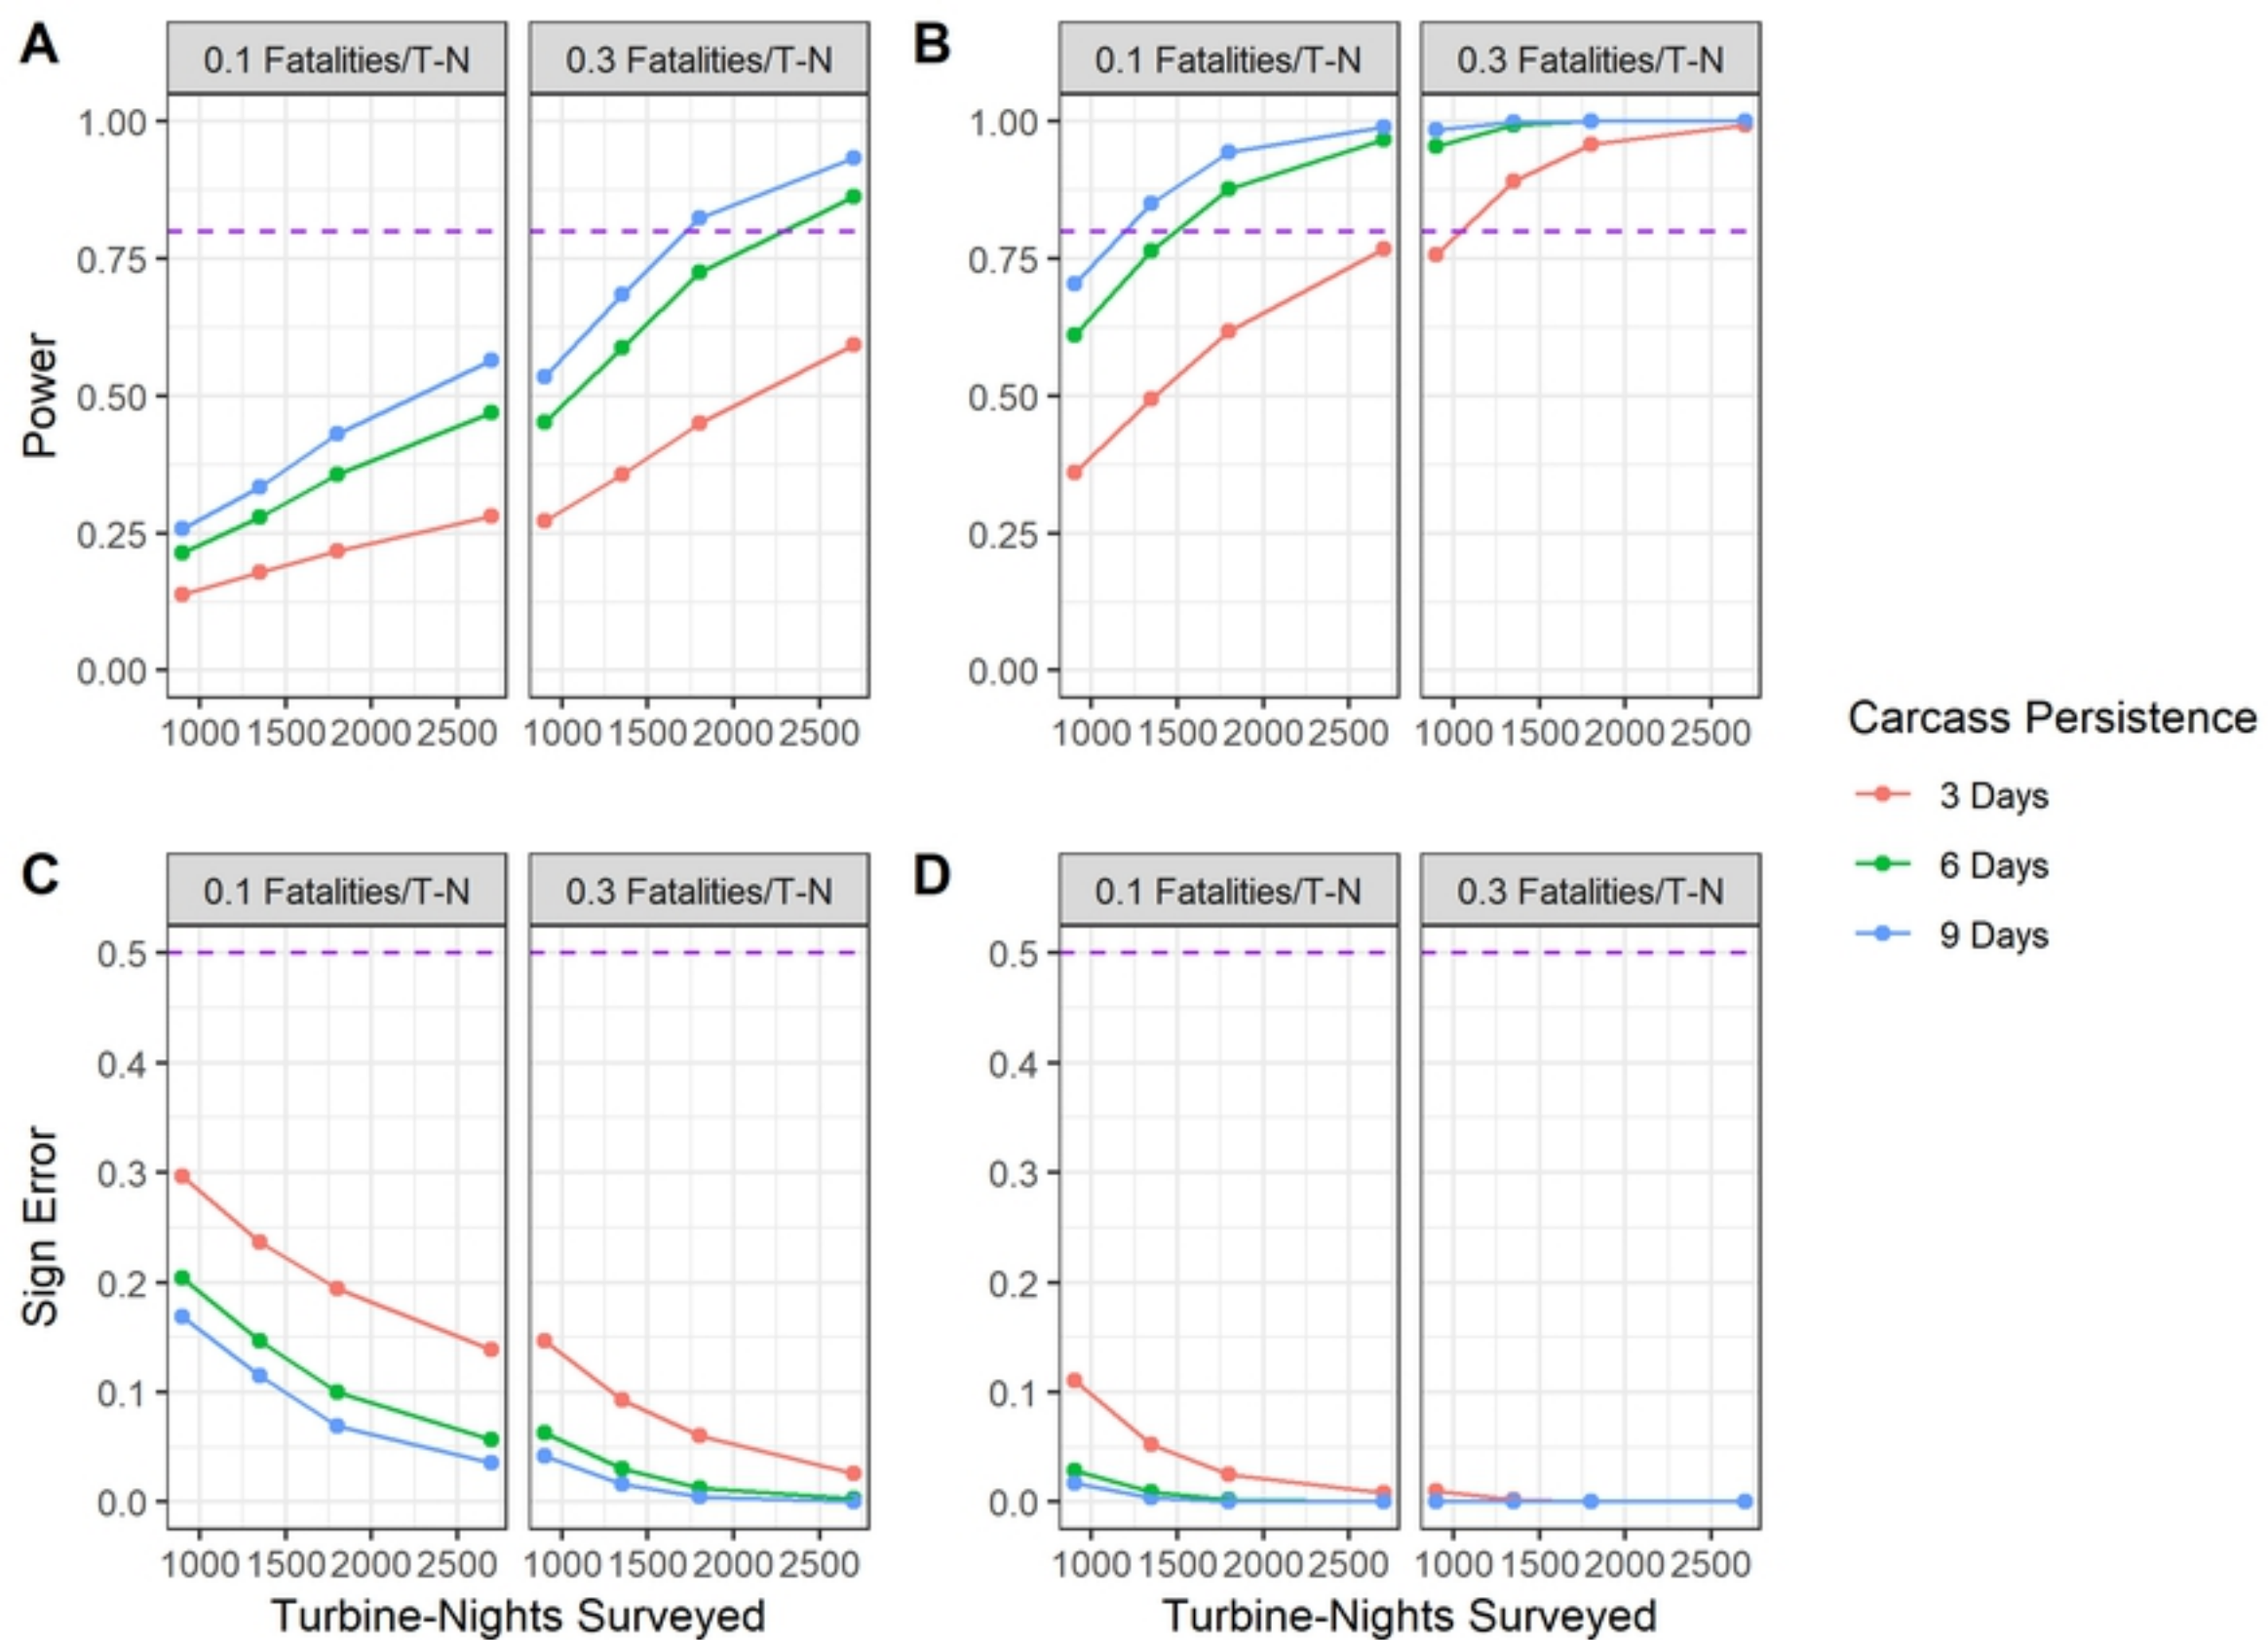

Figure 7
